1 **Mechanistic analysis of the SERK3 *elongated* allele defines a role for BIR ectodomains in**  
2 **brassinosteroid signaling.**

3

4 Ulrich Hohmann<sup>a</sup>, Joël Nicolet<sup>a</sup>, Andrea Moretti<sup>a</sup>, Ludwig A. Hothorn<sup>b,#</sup>, Michael Hothorn<sup>a,1</sup>

5

6 <sup>a</sup>Structural Plant Biology Laboratory, Department of Botany and Plant Biology, University of  
7 Geneva, Switzerland

8 <sup>b</sup>Institute of Biostatistics, Leibniz University, Hannover, Germany

9 <sup>#</sup>retired

10

11 *Corresponding Author*

12 <sup>1</sup>To whom correspondence may be addressed. Email: [michael.hothorn@unige.ch](mailto:michael.hothorn@unige.ch)

13

14

15 *Keywords:* brassinosteroid signaling, membrane receptor kinase, protein kinase, pseudokinase,  
16 leucine-rich repeat domain, receptor activation, protein inhibitor.

17

18 **Abstract**

19 The leucine-rich repeat receptor kinase (LRR-RK) BRI1 requires a shape-complementary SERK  
20 co-receptor for brassinosteroid sensing and receptor activation. Interface mutations that weaken the  
21 interaction between receptor and co-receptor *in vitro* reduce brassinosteroid signaling responses.  
22 The SERK3 *elongated* (*elg*) allele maps to the complex interface and shows enhanced  
23 brassinosteroid signaling, but surprisingly no tighter binding to the BRI1 ectodomain *in vitro*. Here,  
24 we report that rather than promoting the interaction with BRI1, the *elg* mutation disrupts the ability  
25 of the co-receptor to interact with the ectodomains of BIR receptor pseudokinases, negative  
26 regulators of LRR-RK signaling. A conserved lateral surface patch in BIR LRR domains is required  
27 for targeting SERK co-receptors and the *elg* allele maps to the core of the complex interface in a  
28 1.25 Å BIR3 – SERK1 structure. Collectively, our structural, quantitative biochemical and genetic  
29 analyses suggest that brassinosteroid signaling complex formation is negatively regulated by BIR  
30 receptor ectodomains.

31

32

1

### 33 Main

34 The LRR-RK BRASSINOSTEROID INSENSITIVE 1 (BRI1) is the major receptor for growth-  
35 promoting steroid hormones in plants<sup>1,2</sup> and binds brassinosteroids (BRs) including the potent  
36 brassinolide (BL) with its LRR ectodomain<sup>3,4</sup>. Ligand-associated BRI1 can interact with the LRR  
37 domain of a SOMATIC EMBRYOGENESIS RECEPTOR KINASE (SERK) co-receptor kinase,  
38 which completes the steroid binding site<sup>5,6</sup>. Heterodimerisation of the receptor and co-receptor LRR  
39 domains at the cell surface enables the kinase domains of BRI1 and SERK to trans-phosphorylate  
40 each other, allowing BRI1 to activate the cytoplasmic side of the brassinosteroid signaling cascade<sup>7-</sup>  
41 <sup>9</sup>. Mutations in the BRI1 – SERK complex interface that reduce binding between the receptor and  
42 co-receptor ectodomains *in vitro*, weaken the interactions of the full-length proteins *in planta* and  
43 consequently result in BR loss-of-function phenotypes<sup>10</sup>. Previously, two gain-of-function mutations  
44 have been reported for the BR signaling complex. The BRI1 *sud1* allele stabilizes the steroid  
45 binding site of the receptor<sup>11,5</sup>. A similar phenotype is observed with the *elg* mutant<sup>12</sup>, originally  
46 identified as a suppressor of *ga4*, a gibberellic acid biosynthetic enzyme<sup>13</sup>. SERK3<sup>D122</sup> is replaced  
47 by an asparagine residue in *elg* mutant plants<sup>14</sup> and Asn122 maps to the constitutive BRI1 – SERK3  
48 complex interface outside the steroid binding pocket<sup>5,6,10</sup> (Fig. 1a). In BRI1 – SERK complex  
49 structures, SERK3<sup>D122</sup> stabilizes the conformation of SERK3<sup>R146</sup>, which in turn makes polar contacts  
50 with BRI1<sup>E749 3,5,10</sup> (Fig. 1a). Mutation of the corresponding Asp128 to asparagine in rice SERK2 has  
51 been shown to alter these interactions<sup>15</sup>. SERK3<sup>D122</sup> also positions SERK3<sup>E98</sup> to allow for interaction  
52 with BRI1<sup>T750</sup>, which is found replaced by isoleucine in *bri1-102* loss-of-function mutants<sup>16</sup> (Fig.  
53 1a). Taken together, SERK3<sup>D122</sup> is in contact with several residues critically involved in BR  
54 signaling complex formation.

55 We complemented a *serk1-1 serk3-1* double mutant with 6xHA-tagged wild-type or SERK3 mutant  
56 genomic constructs under the control of the SERK3 promoter. We could recapitulate the gain-of-  
57 function phenotype of SERK3<sup>D122N</sup> plants in quantitative hypocotyl growth assays<sup>12</sup> and replacing  
58 SERK3<sup>D122</sup> with alanine resulted in an even stronger BR signaling phenotype (Figs. 1b,c S1,  
59 TableS1). We produced SERK3<sup>D122N</sup> and SERK3<sup>D122A</sup> LRR domains by secreted expression in insect  
60 cells and characterized their interaction with the BRI1 ectodomain in grating-coupled  
61 interferometry (GCI) binding assays<sup>10</sup>. The binding kinetics reveal that wild-type and mutant  
62 SERK3 LRR domains bind BRI1 with similar association rates ( $k_a$ ) (Fig. 1d). SERK3<sup>D122A</sup> but not  
63 SERK3<sup>D122N</sup> has a slower dissociation rate ( $k_d$ ) from the receptor, and consequently a slightly lower  
64 dissociation constant ( $K_D$ ). Overall, the only moderately altered binding kinetics for wild-type vs.

65 mutant SERK3 ectodomains cannot rationalize their gain-of-function phenotype *in planta* (Fig. 1b-  
66 d).

67 Recently, the BRI1-ASSOCIATED-KINASE1 INTERACTING KINASE 3 (BIR3) has been  
68 reported as a negative regulator of BR signaling in Arabidopsis<sup>17</sup>. Ectopic overexpression of BIR3  
69 results in BR loss-of-function phenotypes including BL insensitivity and reduced BRI1-EMS-  
70 SUPPRESSOR 1 (BES1) dephosphorylation<sup>17</sup>. The cytosolic pseudokinase domains of BIR2 and  
71 BIR3 bind the SERK3 kinase domain in yeast-2-hybrid assays and the full-length proteins interact  
72 *in planta*<sup>17,18</sup>. We hypothesized that also the highly conserved BIR ectodomains may contribute to  
73 BIR3 – SERK3 complex formation. Indeed, we found that the recombinantly purified BIR3 LRR  
74 domain binds SERK3 with a  $K_D$  of  $\sim 1 \mu\text{M}$  and with 1:1 stoichiometry (N) in isothermal titration  
75 calorimetry (ITC) experiments (Fig. 2a). No binding was detected between the BIR3 and BRI1  
76 ectodomains (Fig. 2a). While BIR3 and BIR2 cannot discriminate between different SERK  
77 ectodomains *in vitro* ( $K_D$  ranges from  $\sim 1$  to  $\sim 3 \mu\text{M}$ ), *bir3* but not *bir2-1* or *bir2-3* mutant plants  
78 display a weak BR gain-of-function signaling phenotype (Figs. 2a-c, S1,S3, Table S1). SERK – BIR  
79 complex formation is likely driven by their extracellular LRR domains, as we could not observe  
80 detectable binding of the cytoplasmic (pseudo)kinase domains in ITC assays (Fig. S2).

81 We next tested, if the *elg* mutation could modulate the interaction between BIRs and SERK3.  
82 Indeed, the SERK3<sup>D122N</sup> mutant shows  $\sim 4$ -fold reduced binding to BIR3 and  $\sim 8$ -fold reduced  
83 binding to BIR2 (Fig. 2a,b). Due to its low expression yield, the SERK3<sup>D122A</sup> mutant (Fig. 1) could  
84 not be assayed by ITC. Together, our experiments suggest that SERK3<sup>D122</sup> maps to the interface of  
85 different SERK3 – BIR complexes and that interactions between interface residues may be  
86 compromised in the *elg* mutant background.

87 To gain insight into the BIR targeting mechanism, we sought to determine a crystal structure of  
88 BIR3 but did not succeed in obtaining diffraction quality crystals. Crystals of the related BIR2  
89 ectodomain (residues 29-221,  $\sim 60\%$  sequence identity with BIR3) diffracted to 1.9 Å resolution  
90 (Table S2). BIR2 contains five LRRs and shows a high degree of structural conservation with  
91 SERKs (r.m.s.d is  $\sim 1.5$  Å comparing 175 corresponding  $C_\alpha$  atoms in BIR2 and SERK1) with the  
92 exception of a protruding loop in the N-terminal capping domain of BIR2 (magenta in Fig. 3a). The  
93 BIR2 N- and C-terminal caps as well as the LRR core are stabilized by disulfide bridges conserved  
94 among the different BIR family members (Figs. 3c, S4). The conserved Asn58 in the BIR2 N-cap is  
95 glycosylated in our structure (Fig. 3c, S4). A set of solvent exposed hydrophobic residues including  
96 BIR2<sup>W73</sup> from the protruding loop, BIR2<sup>F128</sup>, BIR2<sup>F152</sup> and BIR2<sup>R176</sup> form a lateral surface patch  
97 conserved among BIRs from different species, but not in SERK proteins (Figs. 3b,c, S4). This  
98 potential interaction surface differs from the central binding platform used by SERKs for targeting

99 ligand-sensing LRR-RKs (Fig. 3c)<sup>9,10</sup>. We generated several point-mutations in the respective  
100 surface areas and assayed the mutant proteins vs. SERK3 in ITC assays. BIR2<sup>E84R</sup> and BIR2<sup>V157D</sup>  
101 originating from the central LRR groove still bind SERK3, suggesting that this interaction platform  
102 is not used by BIRs to target SERKs (Figs. 3c,d). Mutation of BIR2<sup>W73</sup> from the protruding N-cap  
103 loop to alanine weakens the interaction with SERK3 and replacing BIR2<sup>F152</sup> or BIR2<sup>R176</sup> from the  
104 lateral surface patch with alanine disrupts binding (Figs. 3c,d). Thus, the unique N-cap loop and the  
105 lateral surface patch in the LRR domain of BIR2 are involved in the interaction with SERK3.  
106 To understand how BIRs target the central, *elg*-containing surface in SERKs, we performed  
107 crystallization trials for various BIR – SERK ectodomain combinations. We obtained crystals for a  
108 BIR3 – SERK1 complex diffracting to 1.25 Å resolution (Table S2). Our crystals contain a fully  
109 glycosylated BIR3 – SERK1 heterodimer in the asymmetric unit, consistent with their in solution  
110 behavior (Figs. 4a, S5). Most surface areas of the SERK1 LRR domain are shielded by  
111 carbohydrate, except for the central interaction surface used to, for example, bind the BRI1 and  
112 HAESA ligand-sensing LRR-RKs<sup>3,5,10,19</sup>. Structural comparison of the BIR3 – SERK1 complex with  
113 structures of the isolated SERK1 and BIR2 ectodomains reveals no major conformational  
114 rearrangements in BIRs and SERKs upon complex formation, with the exception of the protruding  
115 loop containing BIR2<sup>W73</sup> or the corresponding Trp67 in BIR3 (Fig. S6). In the complex structure,  
116 BIR3 establishes a network of hydrophobic and polar interactions with the SERK1 C-terminal cap  
117 and with the two C-terminal LRRs (total buried complex surface area is ~1,400 Å<sup>2</sup>) (Fig. 4a).  
118 Several polar contacts are mediated by water molecules. The complex structure reveals the tip of the  
119 BIR3 protruding N-cap loop in direct contact with the SERK1 *elg* surface (Fig. 4b). SERK residues  
120 Asp122 (numbering corresponds to SERK3 throughout) and the neighboring Tyr124 together  
121 coordinate a water molecule, which in turn hydrogen bonds with BIR3<sup>E69</sup> in the protruding loop tip  
122 (Fig. 4b). The neighboring Tyr100 establishes an additional hydrogen bond with BIR3<sup>E69</sup> and the  
123 remaining loop tip residues BIR3<sup>N68</sup> and BIR3<sup>K70</sup> form similar interaction with SERK residues  
124 Asn148 and Asn77, respectively (Fig. 4b). Importantly, mutation of SERK Tyr100 or Tyr124 to  
125 alanine reduces BIR2 binding (Fig. 4b,d). Both tyrosine residues are also part of the BRI1 – SERK  
126 complex interface and, importantly, mutation of SERK3<sup>Y100</sup> but not SERK3<sup>Y124</sup> to alanine weakens  
127 the interaction with BRI1 (Fig. 4e).  
128 An additional set of hydrophobic contacts involving BIR3<sup>W67</sup> (corresponds to BIR2<sup>W73</sup> analyzed in  
129 Fig. 3c,d), BIR3<sup>I75</sup>, BIR3<sup>Y122</sup>, BIR3<sup>V124</sup> and BIR3<sup>F146</sup> (corresponds to BIR2<sup>F152</sup>, see Fig. 3c,d) and  
130 SERK residues Val168, Ile192, Pro191 are dominating the interactions between the BIR3 and  
131 SERK1 C-terminal halves (Fig. 4a,c). BIR3<sup>R170</sup>, the corresponding mutation in BIR2<sup>R176</sup> to alanine  
132 disrupts complex formation with SERK3 (Fig. 3d), forms hydrogen bonds with backbone atoms in

133 the SERK1 C-cap and other polar contacts are mediated by water molecules (Fig. 4c). Taken  
134 together, BIR3 targets the central LRR surface of SERKs normally used for the interaction with  
135 ligand-sensing LRR-RKs. The unique protruding loop in BIRs directly contacts the *elg* surface  
136 patch, rationalizing the reduced binding of SERK3<sup>D122N</sup> to BIR ectodomains *in vitro* (Fig. 2a,b).  
137 We next tested if the SERK – BIR LRR domain complex interface controls association of the full-  
138 length proteins *in planta*. We found that wild-type SERK3 associated with BIR3 in co-  
139 immunoprecipitation experiments (Fig. 4f), as shown previously<sup>17</sup>. The SERK3<sup>D122N</sup>, SERK3<sup>D122A</sup>,  
140 SERK3<sup>Y100A</sup>, SERK3<sup>Y124A</sup> mutants, all of which show reduced binding to isolated BIR LRR domains  
141 *in vitro*, consistently show reduced interaction with BIR3 *in vivo* (Fig. 4f). SERK3<sup>F60</sup> lies outside the  
142 SERK – BIR complex interface, but forms part of the BRI1 – SERK steroid binding pocket<sup>5,6</sup> and  
143 its mutation to alanine disrupts BR complex formation *in vitro* and *in planta*<sup>10</sup>. Consistent with our  
144 BIR targeting model, the SERK3<sup>F60A</sup> mutant shows wild-type binding to BIRs in ITC assays and  
145 retains interaction with BIR3 *in vivo* (Fig. 4d,f).  
146 Our biochemical observation that SERKs can form tight heterodimeric complexes with BRI1 or  
147 with BIRs using largely overlapping interaction surfaces (Fig. S7), prompted us to investigate if the  
148 BRI1 and BIR ectodomains could compete for SERK binding. We performed analytical size-  
149 exclusion chromatography experiments with the isolated BRI1, SERK3 and BIR2 LRR domains  
150 and in the pre- or ab-sence of the steroid hormone. In our ITC assay (Fig. 2a), we could not detect  
151 complex formation between BRI1 and BIR3, and consistently BIR2 was unable to dissociate an  
152 already formed BRI1-BL-SERK3 complex (Fig. 4g). However, BIR2 could efficiently compete  
153 with BRI1 for SERK3 binding (Fig. 4g), in line with our observation that the experimentally  
154 determined stoichiometries, binding affinities and -kinetics for the different complexes are similar  
155 (Figs. 1d, 2a).  
156 Taken together, the molecular characterization of the SERK3 *elg* allele has revealed that the BR  
157 signaling pathway is under negative regulation by the ectodomain of BIR3. We show that  
158 SERK3<sup>D122N</sup> disrupts BIR but not BRI1 binding and thus exhibits a gain-of-function phenotype  
159 (Figs. 1c,2b). Mutation of the neighboring SERK3<sup>Y100</sup> and SERK3<sup>Y124</sup> to alanine strongly decreases  
160 BIR binding, but only SERK3<sup>Y124A</sup> retains the ability to bind BRI1 – BL with high affinity (Figs. 4d-  
161 f). Consistently, SERK3<sup>Y124A</sup>, but not SERK3<sup>Y100A</sup> or SERK3<sup>Y100A/Y124A</sup> displays a statistically  
162 significant gain-of-function phenotype in hypocotyl growth assays (Fig. 1b,c). The BR-specific  
163 nature of the *elg* allele may thus be related to its ability to bind BRI1, but not other SERK3-  
164 dependent LRR-RKs with high affinity<sup>12</sup>. The *elg* and *bir3* phenotypes and our quantitative  
165 biochemical assays reveal that BRI1 and BIRs can compete for binding to SERKs, with BRI1 being  
166 able to out-compete BIRs in the presence of BL. We speculate that this negative regulation of

167 SERKs by BIR proteins may allow for sharper signal transitions, with signaling competent BR  
168 complexes forming only in response to significant changes in BR concentration.  
169 Specific physiological functions have been genetically assigned to the different BIR family  
170 members in Arabidopsis: BIR1, a catalytically active protein kinase, specifically inhibits SERK3  
171 co-receptor function in immunity and cell death, with *bir1* loss-of-function mutants showing  
172 constitutive defense responses associated with a severe growth phenotype<sup>20-22</sup>. BIR2 and BIR3 are  
173 additional SERK3 interactors and both proteins are pseudokinases<sup>17,18,23</sup>. Different *bir2* knock-down  
174 lines show altered immune responses but no BR signaling phenotype, while *bir3* loss- and gain-of  
175 function mutants affect BR signaling (Fig. 2c)<sup>17,18</sup>. We cannot rationalize these specific functions of  
176 the different BIRs at the biochemical level, as all BIR ectodomains tested bind various SERK  
177 proteins with similar dissociation constants (Fig. 2a), in agreement with a recent study on the role of  
178 BIR1 in FLS2-mediated immune signaling<sup>22</sup>. This behavior of BIR proteins is reminiscent of  
179 SERKs, which also are largely promiscuous at the biochemical level, but which show partly  
180 specific, partly overlapping functions in plant growth, development and immunity<sup>9</sup>. While BIR  
181 ectodomains and not their cytosolic kinase domains allow for high affinity SERK binding (Figs. 2-  
182 4, S2), BIR signaling specificity may be encoded in their cytosolic domains, as seen with ligand-  
183 sensing LRR-RKs<sup>10,24</sup>. In line with this, specific BIR adapter proteins have been reported<sup>25,26</sup>, which  
184 could allow for the targeting of BIR family members to specific membrane (nano)-domains<sup>27</sup>, and  
185 which could help to create specific signaling outputs in the cytosol<sup>25</sup>. The fact that the *bir3-2* mutant  
186 does not phenocopy *elg* plants (Figs. 1b, 2c), suggests that other negative regulators of BR signaling  
187 complexes remain to be discovered in the future.

188

## 189 **Methods**

190

### 191 **Plant material and growth conditions**

192 Genomic *SERK3* was amplified from *Arabidopsis thaliana* (ecotype Col-0), cloned into  
193 pDONR221 (ThermoFisher Scientific) and mutations were introduced by site directed mutagenesis  
194 (TableS3). Constructs were assembled employing multi-site Gateway technology into the binary  
195 vector pH7m34GW (ThermoFisher Scientific), introduced in the *Agrobacterium tumefaciens* strain  
196 pGV2260, and transformed into *Arabidopsis* using the floral dip method<sup>28</sup>. Plants were grown in  
197 long day conditions (16 h light) at 21 °C, 50 % humidity and analyzed in homozygous T3  
198 generation. The *bir2-1*, *bir2-3* and *bir3-2* T-DNA insertion lines were obtained from the Nottingham  
199 Arabidopsis Stock Center (NASC).

200

## 201 **Hypocotyl growth assay**

202 After surface sterilization with 70 % ethanol, 0.1 % Triton X-100 for 20 min and stratification at 4  
203 °C for 2 days, seeds were plated on ½ MS, 0.8 % agar plates supplemented with either 1 µM  
204 brassinazole (BRZ, from a 10 mM stock solution in 100 % DMSO, Tokyo Chemical Industry Co.  
205 LTD) or, for the controls, with 0.1 % (v/v) DMSO. After light exposure for 1 h, plates were  
206 incubated at 22 °C for 5 d in the dark and subsequently scanned at 600 dpi on a regular flatbed  
207 scanner (CanoScan 9000F, Canon). Measurements were taken using FIJI<sup>29</sup> and analyzed with the  
208 packages mratios<sup>30</sup> and multcomp<sup>31</sup> as implemented in R<sup>32</sup> (version 3.3.2). We report unadjusted  
209 95% confidence limits for fold-changes instead of p-values<sup>33</sup>. Log-transformed endpoint hypocotyl  
210 lengths were analyzed employing a mixed effects model for the ratio of of a given line 'to the wild-  
211 type Col-0 allowing heterogeneous variances. To evaluate the treatment-by-mutant interaction, the  
212 95 % two-sided confidence intervals for the relative inhibition (Col-0: untreated vs. BRZ-treated  
213 hypocotyl length)/(any genotype: untreated vs. BRZ-treated hypocotyl length) was calculated for  
214 the log-transformed length. Hypocotyl growth assays were performed three times, with similar  
215 results.

216

## 217 **Protein expression and purification**

218 SERK2<sup>1-220</sup>, SERK3<sup>1-220</sup> and BRI1<sup>1-799</sup> were amplified from *A. thaliana* cDNA and BIR1<sup>1-219</sup>, BIR2<sup>1-  
219 222</sup>, BIR3<sup>1-213</sup> and BIR4<sup>1-206</sup> from *A. thaliana* genomic DNA. BIR2<sup>1-222</sup> was in addition obtained  
220 codon-optimized for expression in *Trichoplusia ni* (Tnao), (Invitrogen GeneArt, Germany),  
221 SERK1<sup>24-213</sup> was obtained codon optimized and fused to an azurocidin signal peptide; all constructs  
222 were cloned in a modified pFastBac vector (Geneva Biotech), containing a TEV (tobacco etch virus  
223 protease) cleavable C-terminal StrepII-9xHis tag. Mutations were created using site directed  
224 mutagenesis (TableS3). Tnao38<sup>34</sup> cells were infected with a multiplicity of infection (MOI) of 1 for  
225 SERKs or 3 for BRI1 and BIRs at a density of 2x10<sup>6</sup>cells/ml and incubated 26 h at 28 °C and 48 h  
226 at 22 °C. Subsequently the secreted proteins were purified from the supernatant by Ni<sup>2+</sup> (HisTrap  
227 excel; GE Healthcare; equilibrated in 25 mM KP<sub>i</sub> pH 7.8, 500 mM NaCl) and StrepII (Strep-Tactin  
228 Superflow high capacity; IBA; equilibrated in 25 mM Tris pH 8.0, 250 mM NaCl, 1 mM EDTA)  
229 affinity chromatography. The purity of the preparations was further improved by size-exclusion  
230 chromatography on either a Superdex 200 increase 10/300 GL, HiLoad 16/600 Superdex 200 pg or  
231 HiLoad 26/600 Superdex 200 pg column (GE Healthcare), equilibrated in 20 mM sodium citrate pH  
232 5.0, 150 mM NaCl.

233 The cytosolic domain of BIR2 (residues 258-605 or 289-605) was cloned in a modified pET vector  
234 (Novagen) providing a TEV cleavable N-terminal 8xHis-StrepII-Thioredoxin tag, constructs were

235 transformed in *E.coli* BL21 (DE3) RIL cells. Protein expression was induced by adding IPTG (0.5  
236 mM final concentration) to cell cultures grown at 37 °C to a OD<sub>600</sub>= 0.6 and bacteria were harvested  
237 after incubation for 18 h at 16 °C. SERK3 (residues 250-615) and BRI1 (residues 814-1196)  
238 cytoplasmic domains were cloned in a modified pFastBac vector (Geneva Biotech) with a TEV-  
239 cleavable N-terminal 10xHis-2xStrepII tag for expression in insect cells. Proteins were expressed in  
240 Tnao38 cells for three days at 28 °C after infection with a MOI of 2.

241 For purification from bacterial as well as from insect cells, pellets were resuspended in buffer A (20  
242 mM Hepes pH 7.5, 500 mM NaCl, 4 mM MgCl<sub>2</sub>, 2mM β-mercaptoethanol) and disrupted by  
243 sonication. The cell debris was removed by centrifugation at 20,000 g for 1 h at 4 °C and the  
244 recombinant proteins were purified by sequential Ni<sup>2+</sup> (HisTrap excel; GE Healthcare; equilibrated  
245 in buffer A) and StrepII (Strep-Tactin XT Superflow; IBA; equilibrated in 25 mM Tris pH 8.0, 250  
246 mM NaCl, 1 mM EDTA) affinity chromatography. The tags were cleaved-off by incubating the  
247 protein with TEV protease overnight at 4 °C. The cleaved tags and the protease were removed by an  
248 additional Ni<sup>2+</sup> affinity chromatography step. The recombinant proteins were further purified by size  
249 exclusion chromatography at 4 °C on a HiLoad 16/600 Superdex 200 pg (GE Healthcare)  
250 equilibrated with 20 mM Hepes pH 7.5, 150 mM NaCl, 1 mM MgCl<sub>2</sub>, 0.5 mM TCEP. Proteins  
251 concentrated to 15 mg/ml and snap frozen in liquid N<sub>2</sub>.

252 Molar protein concentrations for BIR2, BIR3, SERK1, SERK3 and BRI1 were calculated using  
253 their molar extinction coefficient and molecular weights of 23.4, 24.0, 25.2, 27.4, 105.0 kDa,  
254 respectively (as determined by MALDI-TOF mass spectrometry). The calculated molecular masses  
255 for BIR2<sup>289-605</sup>, BIR2<sup>258-605</sup>, SERK3<sup>250-615</sup>, BRI1<sup>814-1196</sup> are 35.3, 38.8, 41.5, 42.7 kDa, respectively.

256

### 257 **Grating coupled interferometry (GCI)**

258 The Creoptix WAVE system (Creoptix AG, Switzerland), a label-free surface biosensor<sup>35</sup> was used  
259 to perform GCI experiments. All experiments were performed on 2PCP WAVEchips (quasi-planar  
260 polycarboxylate surface; Creoptix AG, Switzerland). After a borate buffer conditioning (100 mM  
261 sodium borate pH 9.0, 1 M NaCl; Xantec, Germany) the respective LRR ectodomain was  
262 immobilized on the chip surface using standard amine-coupling: 7 min activation (1:1 mix of 400  
263 mM N-(3-dimethylaminopropyl)-N'-ethylcarbodiimide hydrochloride and 100 mM N-  
264 hydroxysuccinimide [both Xantec, Germany]), injection of the LRR domain (10 to 40 µg/ml) in 10  
265 mM sodium acetate pH 5.0 (Sigma, Germany) until the desired density was reached, passivation of  
266 the surface (0.5% BSA [Roche, Switzerland] in 10mM sodium acetate pH 5.0) and final quenching  
267 with 1 M ethanolamine pH 8.0 for 7 min (Xantec, Germany). For a typical experiment, SERK3 was  
268 injected in a 1:2 dilution series (starting from 2 µM) in 20mM citrate pH 5.0, 250mM NaCl at 25°C.



269 Blank injections were used for double referencing and a DMSO calibration curve for bulk  
270 correction. Analysis and correction of the obtained data was performed using the Creoptix  
271 WAVEcontrol software (applied corrections: X and Y offset, DMSO calibration, double referencing)  
272 and a one-to-one binding model with bulk correction was used to fit all experiments.

273

#### 274 **Isothermal titration calorimetry (ITC)**

275 All ITC experiments were performed on a Nano ITC (TA Instruments) with a 1.0 ml standard cell  
276 and a 250  $\mu$ l titration syringe at 25 °C. Proteins were gelfiltrated or dialyzed into ITC buffer (20  
277 mM sodium citrate pH 5.0, 150 mM NaCl for LRR domains / 20 mM Hepes pH 7.5, 150 mM NaCl,  
278 1 mM MgCl<sub>2</sub>, 0.5 mM TCEP for kinase domains) prior to all experiments. For a typical ectodomain  
279 experiment, 16  $\mu$ l of BIR (at ~400  $\mu$ M) was injected into ~40  $\mu$ M SERK protein in the cell at 150 s  
280 intervals (15 injections). Experiments with the kinase domains were performed by injecting 10  $\mu$ l of  
281 BIR2 or BRI1 cytosolic domain at ~200  $\mu$ M into ~20  $\mu$ M of SERK3 kinase domain in the cell at  
282 150s intervals (25 injections). Data was corrected for the dilution heat and analyzed using  
283 NanoAnalyze program (version 3.5) as provided by the manufacturer. All quantitative biochemical  
284 assays were performed at least twice.

285

#### 286 **Protein crystallization and data collection**

287 Crystals of the isolated BIR2 ectodomain were grown in sitting drops composed of 0.2  $\mu$ l of protein  
288 solution (BIR2<sup>1-222</sup> at 9 mg/ml in 20 mM sodium citrate pH 5.0, 150 mM NaCl) and 0.2  $\mu$ l of 1.8 M  
289 sodium malonate pH 4.0. Crystals formed after several months, were cryoprotected in 2.4 M sodium  
290 malonate pH 4.0 and were snap frozen in liquid N<sub>2</sub>. Native ( $\lambda$ = 1.000020 Å) and anomalous ( $\lambda$ =  
291 1.999770 Å) datasets were collected from a single crystal at beam line PX-III of the Swiss Light  
292 Source, Villigen (Table S2). Crystals of the BIR3<sup>1-213</sup> – SERK1<sup>24-213</sup> complex were grown from  
293 hanging drops containing 1  $\mu$ l of protein solution (14 mg/ml in 20 mM sodium citrate pH 5.0, 150  
294 mM NaCl) and crystallization buffer (19% [v/v] PEG 3,350, 1M LiCl, 0.1 M sodium acetate pH  
295 5.5), suspended over 0.6 ml of the latter as reservoir solution. Crystals were cryoprotected by serial  
296 transfer in reservoir solution supplemented with a final concentration of 15% (v/v) glycerol.  
297 Crystals diffracted up to 1.0 Å at PX-III and due to the beam line geometry, a complete dataset at  
298 1.25 Å was recorded (Table S2). Data processing and scaling was done with XDS<sup>36</sup> (version: June,  
299 2017).

300

301

302

### 303 **Crystallographic structure solution and refinement**

304 The BIR2 anomalous dataset was used for experimental phasing using the Single Anomalous  
305 Diffraction (SAD) method. Ten consistent sulfur sites were identified using ShelxD<sup>37</sup> and  
306 Phenix.hyss<sup>38</sup> and used for site refinement and phasing in Sharp<sup>39</sup> (Table S2). Density modification,  
307 2-fold NCS averaging and phase extension to 1.9 Å in the program Phenix.resolve<sup>40</sup> yielded a  
308 readily interpretable electron density map and the structure was completed in alternating cycles of  
309 manual building/rebuilding in Coot<sup>41</sup>, and restrained TLS refinement in Refmac5<sup>42</sup>.

310 The structure of the BIR3 – SERK1 complex was solved using the molecular replacement method  
311 as implemented in the program Phaser<sup>43</sup>, and using the isolated BIR2 and SERK1 (PDB-ID 4LSC<sup>5</sup>)  
312 structures as search models. The solution comprises a hetero-dimer in the asymmetric unit and the  
313 structure was completed by manual correction in Coot and anisotropic refinement in Refmac5.

314 The quality of the refined structures were assessed using the program Molprobity<sup>44</sup>, structural  
315 diagrams were made with Pymol (<https://sourceforge.net/projects/pymol/>) and Chimera<sup>45</sup>.

316

### 317 **Analytical size exclusion chromatography**

318 Gel filtration experiments were performed using a Superdex 200 Increase 10/300 GL column (GE  
319 Healthcare) pre-equilibrated in either 20 mM sodium citrate pH 5.0, 150 mM NaCl for LRR domain  
320 interaction assays, or with 20 mM Hepes pH 7.5, 150 mM NaCl, 1 mM MgCl<sub>2</sub>, 0.5 mM TCEP for  
321 cytoplasmic domain oligomeric state analysis. 500 µl of the respective protein (0.2 mg/mL) was  
322 loaded sequentially onto the column and elution at 0.75 ml/min was monitored by ultraviolet  
323 absorbance at 280 nm. BL concentration was 1 µM in the BRI1 – BL - SERK3 complex sample  
324 prior to loading.

325

### 326 **Plant protein extraction and immunoprecipitation**

327 Surface-sterilized and stratified seeds were plated on ½ MS, 0.8 % agar plates and grown for ~14 d.  
328 Seedlings were frozen in liquid N<sub>2</sub>, ground to fine powder using mortar and pestel (1 g per sample)  
329 and resuspended in 3 ml of ice cold extraction buffer (50 mM Bis-Tris pH 7.0, 150mM NaCl, 10 %  
330 (v/v) glycerol, 1 % Triton X-100, 5 mM DTT, protease inhibitor cocktail (P9599, Sigma). After  
331 gentle agitation for 1 h at 4 °C, samples were centrifuged for 30 min at 4 °C and 16,000 g; the  
332 supernatant was transferred to a fresh tube and the protein concentration measured using a Bradford  
333 assay. 20 mg of total protein in a volume of 5 ml were incubated with 50 µl of anti-HA  
334 superparamagnetic MicroBeads (Miltenyi Biotec) for 1 h at 4 °C with agitation for each co-  
335 immunoprecipitation (Co-IP). The beads were then collected using µMACS Columns (Miltenyi  
336 Biotec), washed 4 times with 1 ml of cold extraction buffer and proteins were eluted in 20+20 µl of

337 extraction buffer at 95 °C. Samples were separated on 10 % SDS-PAGE gels; In the subsequent  
338 western blots SERK3:6HA was detected using anti-HA antibody coupled to horse radish peroxidase  
339 (HRP, Miltenyi Biotec) at 1:5,000 dilution, while BIR3 was detected using a polyclonal BIR3  
340 antibody<sup>17</sup> at 1:500 dilution followed a secondary anti-rabbit HRP antibody (1:10,000, Calbiochem  
341 #401353). Co-immunoprecipitation experiments were repeated two times, with similar outcome.

342

### 343 **Acknowledgements**

344 We thank B. Kemmerling for kindly providing us with BIR2 and BIR3 polyclonal antibodies, staff  
345 at beam line PXIII of the Swiss Light Source, Villigen, Switzerland for technical assistance during  
346 data collection, J. Santiago for providing the SERK2 expression plasmid, and K. Lau for help with  
347 preparing figures. Crystallographic coordinates and structure factors have been deposited with the  
348 Protein Data Bank (<http://rcsb.org>) with accession codes 6FG7 (BIR2) and 6FG8 (BIR3 – SERK1).  
349 This work was supported by grant 31003A\_176237 from the Swiss National Science Foundation  
350 and by an International Research Scholar Award from the Howard Hughes Medical Institute (to  
351 MH).

352

353

### 354 **Figure legends**

355 **Fig. 1: SERK3 *elg* is a gain of function allele *in vivo* but not *in vitro*.**

356 **a**, Ribbon diagram of the *elg*-containing complex interface, as seen in the BRI1 – BL – SERK1  
357 structure (PDB-ID 4LSX<sup>5</sup>). BRI1 and SERK are depicted in blue and orange, respectively, selected  
358 residues are shown in ball-and-stick representation with the *elg* residue Asp122 highlighted in  
359 yellow. Polar interactions are shown as dotted lines. SERK residue numbering is according to the  
360 SERK3 sequence throughout.

361 **b**, Hypocotyl growth assay of dark grown seedlings in the pre- and absence of the BR biosynthesis  
362 inhibitor brassinazole (BRZ). The BRZ hypersensitivity seen in the *serk1-1 serk3-1* mutant is  
363 complemented by the expression of SERK3<sup>WT</sup> (Col-0 is the untransformed wild-type). Shown  
364 alongside is the quantification of the data with relative inhibition plotted together with lower and  
365 upper confidence intervals (N=5, n=50).

366 **c**, Western blot using an HA antibody against SERK3:HA from plant material shown in (a). A  
367 Ponceau loading control is shown alongside.

368 **d**, Binding kinetics for SERK3, SERK3<sup>D122A</sup> and SERK3<sup>D122N</sup> (*elg*) vs. BRI1 in the presence of BL  
369 obtained from grating-coupled interferometry (GCI) experiments. Sensograms with recorded data

370 are shown in red with the respective fits in black, and include table summaries of the corresponding  
371 association rate constant ( $k_a$ ), dissociation rate constant ( $k_d$ ) and dissociation constant  $K_D$ .

372

373 **Fig. 2: BIR ectodomains interact with different SERK co-receptors *in vitro*.**

374 **a,b**, Isothermal titration calorimetry (ITC) experiments of BIR2 and BIR3 LRR domains vs. **(a)**  
375 wild-type SERK ectodomains and **(b)** vs. the SERK3<sup>D122N</sup> mutant ectodomain and including table  
376 summaries for dissociation constants ( $K_D$ ) and binding stoichiometries (N) ( $\pm$  fitting error; n.d.: no  
377 detectable binding).

378 **c**, Hypocotyl growth assay in the pre- and absence of BRZ (compare Fig. 1b). Relative inhibition  
379 together with upper and lower confidence intervals are shown alongside; Col-0 and *serk1-1 serk3-1*  
380 are the same as shown in Fig. 1b (N=5, n=50).

381

382 **Fig. 3: The BIR2 ectodomain adopts a SERK-like fold with an additional lateral protein**  
383 **interaction interface.**

384 **a**, Structural superposition of the isolated BIR2 and SERK1 (PDB-ID 4LSC<sup>5</sup>) ectodomains (r.m.s.d.  
385 is  $\sim 1.5$  Å comparing 175 corresponding  $C_\alpha$  atoms).  $C_\alpha$  traces of SERK1 (orange) and BIR2 (blue)  
386 are shown; the unique, protruding BIR2 N-terminal cap loop region is highlighted in magenta.

387 **b**, Surface representation of the BIR2 ectodomain, gradient colored according to the amino-acid  
388 sequence conservation of BIR proteins from different species (compare Fig. S4).

389 **c**, The extracellular BIR2 domain consists of five LRRs with N- and C-terminal capping domains  
390 and a lateral protein interaction interface. Shown is a ribbon diagram of the BIR2 LRR domain (in  
391 blue), the four disulfide bonds are highlighted in green, selected residues in the lateral interface are  
392 in yellow, residues in the LRR central groove in orange, and the N-glycan moiety in gray (all in  
393 ball-and-sticks representation).

394 **d**, ITC experiments of BIR2 ectodomain mutants vs. the extracellular domain of SERK3 with table  
395 summaries alongside.

396

397 **Fig. 4: A BIR3-SERK1 complex structure provides a mechanism for SERK gain-of-function**  
398 **mutations.**

399 **a**, Structure of the BIR3 – SERK1 ectodomain complex, with BIR3 shown in blue and SERK1 in  
400 orange and with N-glycans highlighted in ball-and-sticks representation.

401 **b,c**, Detailed views of the BIR3 – SERK1 complex interface. Selected interface residues are shown  
402 in ball-and-sticks representation with the mutationally analyzed Tyr100, Asp122 and Y214

403 highlighted in yellow. Water molecules are depicted as red spheres, polar interactions are shown as  
404 dotted lines.

405 **d**, ITC binding experiments of BIR2 vs. different SERK3 mutants.

406 **e**, Binding kinetics of SERK3<sup>Y100A</sup> and SERK3<sup>Y124A</sup> to BL-associated BRI1 derived from GCI  
407 experiments. Fitted kinetic parameters are shown alongside.

408 **f**, Co-immunoprecipitation (Co-IP) experiment using different SERK3 lines vs. BIR3. Input  
409 western-blots and a Ponceau stained membrane are shown alongside.

410 **g**, Size-exclusion chromatography experiments using the BIR2, SERK3, BRI1 ectodomains. BIR2  
411 forms no complex with BRI1 (red line), and is not able to dissociate a preformed BRI1 – BL –  
412 SERK3 complex (gray line). However, incubation of a preformed BIR2 – SERK3 complex with  
413 BRI1 – BL reveals formation of BRI1 – BL – SERK3 complexes (black line), suggesting that BRI1  
414 – BL can compete with BIR2 for SERK3 binding. Void ( $v_0$ ) volume and total volume ( $v_t$ ) are  
415 shown, together with elution volumes for molecular mass standards (Al, Aldolase, 158,000 Da; Ov,  
416 Ovalbumin, 44,000 Da; CA, Carbonic anhydrase, 29,000 Da). Peak fractions were analyzed by  
417 SDS-PAGE.

418

#### 419 **Supplemental Figures**

##### 420 **Fig. S1: Hypocotyl growth assay raw data.**

421 Shown are box plots with the raw data depicted as individual dots. Untreated: black, BRZ treated:  
422 blue, N=5, n=50.

423

##### 424 **Fig. S2: The recombinant BIR2 and SERK3 cytoplasmic domains do not interact *in vitro*.**

425 **a**, Structural organization of the SERK3, BIR2 and BRI1 cytoplasmic domains (CD) with domain  
426 borders included. JM, juxtamembrane domain; KD, kinase domain; CT, C-terminal domain.

427 **b,c**, Analysis of the purified cytoplasmic domains on **(b)** a Coomassie stained 10 % SDS-PAGE gel  
428 and **(c)** by size exclusion chromatography on a Superdex 200 increase 10/300 GL column (GE  
429 Healthcare) reveals that all isolated cytoplasmic domains behave as apparent monomers in solution.  
430 The void ( $v_0$ ) volume is shown, together with elution volumes for molecular mass standards (Ov,  
431 Ovalbumin, 44,000 Da; CA, Carbonic anhydrase, 29,000 Da).

432 **d**, Isothermal titration calorimetry (ITC) experiments with cytoplasmic domains of SERK3 vs.  
433 BIR2 (left) and BRI1 (right). No binding was detected, suggesting that the binding affinity between  
434 BIR2 and SERK3 or BRI1 and SERK3 is relatively low. Thus, BIR binding may be driven by their  
435 extracellular, rather than by their cytoplasmic domains.

436

437 **Fig. S3: Expression levels of BIR2/3 in mutant lines.**

438 **a**, Schematic overview of the T-DNA insertion sites *bir2-1*<sup>18</sup> and *bir2-3* (SAIL1288\_G07, this  
439 study) shown as black triangles in the *BIR2* locus (bold black arrow).

440 **b**, Analysis of BIR2 protein levels in wild-type Col-0, *bir2-1* and *bir2-3* mutant plants.

441 **c**, BIR3 protein levels in Col-0 and *bir3-2*<sup>17</sup> mutant lines. Ponceau stained membranes are shown  
442 alongside as loading controls.

443

444 **Fig. S4: BIR – SERK complex interface residues are conserved among BIR family members**  
445 **from different species.**

446 **a**, Structure based sequence alignment of the ectodomains of *Arabidopsis thaliana* SERK1 (Uniprot  
447 [<http://www.uniprot.org>] identifier: Q94AG2), SERK3 (Uniprot identifier: Q94F62), BIR1  
448 (Uniprot identifier: Q9ASS4), BIR2 (Uniprot identifier: Q9LSI9), BIR3 (Uniprot identifier:  
449 O04567), BIR4 (Uniprot identifier: C0LGI5), *Arabidopsis lyrata* BIR2 (Uniprot identifier:  
450 D7LPU1), *Ricinus communis* BIR (Uniprot identifier: B9RUI5), *Nicotiana tabacum* BIR (Uniprot  
451 identifier: A0A1S4BB12), *Zea mays* BIR2 (Uniprot identifier: K7TUC5), *Hordeum vulgare* BIR  
452 (Uniprot identifier: F2E7N3) and *Marchantia polymorpha* BIR (Uniprot identifier: A7VM20).  
453 Shown alongside is a secondary structure assignment, with the N- and C-terminal capping domains  
454 highlighted in red, calculated using DSSP<sup>46</sup>. BIR residues of the lateral protein interaction interface  
455 are highlighted in blue, disulfide bridges in yellow and the conserved N-terminal glycosylation site  
456 in gray. All numbering refers to AtBIR2.

457

458 **Fig. S5: The BIR3 and SERK1 ectodomains form heterodimers in solution.**

459 **a,b**, Analytical size exclusion chromatography. The isolated BIR3 (red absorption trace) and  
460 SERK3 (blue) ectodomains elute as apparent monomers when run in isolation, and form a  
461 heterodimeric complex (black line). Void ( $v_0$ ) volume and total volume ( $v_t$ ) are shown, together with  
462 elution volumes for molecular mass standards (Al, Aldolase, 158,000 Da; Ov, Ovalbumin, 44,000  
463 Da; CA, Carbonic anhydrase, 29,000 Da). A SDS PAGE analysis of the peak fractions is shown in  
464 **(b)**.

465

466 **Fig. S6: No major conformational changes occur upon BIR3 – SERK1 complex formation.**

467 Structural superposition of the BIR3 – SERK1 complex with the isolated BIR2 (r.m.s.d. is  $\sim 1.2$  Å  
468 comparing 160 corresponding  $C_\alpha$  atoms) and SERK1 (PDB-ID 4LSC<sup>5</sup>, r.m.s.d. is  $\sim 0.9$  Å comparing  
469 186 corresponding  $C_\alpha$  atoms) ectodomains. Shown are  $C_\alpha$  traces of SERK1 (orange for the isolated

470 ectodomain and red for SERK1 in complex with BIR3), BIR2 (in cyan) and BIR3 (in blue).  
471 BIR3<sup>W67</sup> and the corresponding BIR2<sup>W73</sup> are highlighted as ball-and-sticks.

472

473 **Fig. S7: Partly overlapping surface areas in SERK1 are involved in BRI1 and BIR3 binding,**  
474 **respectively.**

475 Surface view of the SERK1 ectodomain with BRI1 (left) and BIR3 (right) interacting residues  
476 (defined using the program PISA<sup>47</sup>) shown in dark gray. Interaction with BRI1 involves mainly  
477 residues originating from the SERK1 N-terminal cap, while the interaction with BIR3 involves  
478 residues from the two C-terminal LRRs and from the C-terminal cap. Importantly, the *elg* mutation  
479 and the corresponding SERK3<sup>D122</sup> forms part of both complex interfaces (highlighted in orange).

480

481 **Table S1: Statistical evaluation of the hypocotyl growth assay**

482

|                             | <b>relative Inhibition</b> | <b>Lower CI</b> | <b>Upper CI</b> |
|-----------------------------|----------------------------|-----------------|-----------------|
| <i>serk1-1, 3-1</i> / Col-0 | 0.532                      | 0.512           | 0.553           |
| SERK3 <sup>WT</sup> / Col-0 | 0.863                      | 0.830           | 0.897           |
| Y100A / Col-0               | 0.644                      | 0.619           | 0.669           |
| Y124A / Col-0               | 1.026                      | 0.987           | 1.066           |
| Y100A, Y124A / Col-0        | 0.650                      | 0.626           | 0.676           |
| D122A / Col-0               | 2.013                      | 1.937           | 2.092           |
| D122N / Col-0               | 1.384                      | 1.332           | 1.439           |
| F144A / Col-0               | 0.671                      | 0.646           | 0.697           |
| bir2-1 / Col-0              | 0.962                      | 0.925           | 0.999           |
| bir2-3 / Col-0              | 0.962                      | 0.927           | 0.998           |
| bir3-2 / Col-0              | 1.134                      | 1.092           | 1.179           |

483 CI, Confidence Interval

484

485



486 **Table S2. Crystallographic data collection, phasing and refinement.**

|                                        | <b>BIR2</b><br><i>sulfur SAD</i> | <b>BIR2</b><br><i>native</i> | <b>BIR3 – SERK1</b><br><i>native</i> |
|----------------------------------------|----------------------------------|------------------------------|--------------------------------------|
| <b>Data collection</b>                 |                                  |                              |                                      |
| Space group                            | <i>P</i> 6 <sub>4</sub> 22       | <i>P</i> 6 <sub>4</sub> 22   | <i>P</i> 2 <sub>1</sub>              |
| Wavelength (Å)                         | 1.999770                         | 1.000020                     | 1.033201                             |
| Cell dimensions                        |                                  |                              |                                      |
| <i>a</i> , <i>b</i> , <i>c</i> (Å)     | 153.77, 153.77, 110.06           | 153.77, 153.77, 110.06       | 52.17, 50.76, 77.43                  |
| $\alpha$ , $\beta$ , $\gamma$ (°)      | 90, 90, 120                      | 90, 90, 120                  | 90, 96.72, 90                        |
| Resolution (Å)                         | 44.75 – 3.0 (3.08 – 3.0)         | 45.77 – 1.90 (2.02 – 1.90)   | 40.81 – 1.25 (1.33 – 1.25)           |
| $R_{meas}$ <sup>#</sup>                | 0.229 (1.00)                     | 0.221 (2.88)                 | 0.058 (1.10)                         |
| CC(1/2) (%) <sup>#</sup>               | 100.0 (96.1)                     | 100.0 (42.9)                 | 100.0 (85.3)                         |
| $I/\sigma I$ <sup>#</sup>              | 35.50 (7.69)                     | 11.90 (1.0)                  | 15.1 (1.5)                           |
| Completeness (%) <sup>#</sup>          | 100.0 (99.8)                     | 100.0 (97.9)                 | 99.8 (95.5)                          |
| Redundancy <sup>#</sup>                | 121.9 (121.4)                    | 13.15 (12.8)                 | 6.3 (5.7)                            |
| Wilson B-factor <sup>#</sup>           |                                  | 35.0                         | 21.4                                 |
| <b>Phasing</b>                         |                                  |                              |                                      |
| Resolution (Å)                         | 44.75 – 3.00                     |                              |                                      |
| No. of sites                           | 10                               |                              |                                      |
| Phasing power (ano) <sup>†</sup>       | 0.558                            |                              |                                      |
| FOM <sup>†</sup>                       | 0.27                             |                              |                                      |
| <b>Refinement</b>                      |                                  |                              |                                      |
| Resolution (Å)                         |                                  | 45.77 – 1.90                 | 40.81 – 1.25                         |
| No. reflections                        |                                  | 57,323                       | 104,302                              |
| $R_{work}/R_{free}$ <sup>§</sup>       |                                  | 0.21/0.23                    | 0.15/0.18                            |
| No. atoms                              |                                  |                              |                                      |
| protein                                |                                  | 2,986                        | 2,962                                |
| glycan                                 |                                  | 59                           | 189                                  |
| PEG                                    |                                  |                              | 44                                   |
| solvent                                |                                  | 120                          | 433                                  |
| Res. B-factors <sup>§</sup>            |                                  |                              |                                      |
| protein                                |                                  | 37.4                         | 21.1                                 |
| glycan                                 |                                  | 54.6                         | 72.32                                |
| PEG                                    |                                  |                              | 44.8                                 |
| solvent                                |                                  | 36.7                         | 39.22                                |
| R.m.s deviations <sup>§</sup>          |                                  |                              |                                      |
| Bond lengths (Å)                       |                                  | 0.008                        | 0.012                                |
| Bond angles (°)                        |                                  | 1.34                         | 1.61                                 |
| Molprobrity results                    |                                  |                              |                                      |
| Ramachandran outliers (%) <sup>‡</sup> |                                  | 0.0                          | 0.0                                  |
| Ramachandran favored (%) <sup>‡</sup>  |                                  | 95.5                         | 95.7                                 |
| Molprobrity score <sup>‡</sup>         |                                  | 1.32                         | 1.33                                 |
| PDB - ID                               |                                  | <b>6FG7</b>                  | <b>6FG8</b>                          |

487 <sup>#</sup>as defined XDS<sup>36</sup>, <sup>†</sup>in Sharp<sup>39</sup>, <sup>§</sup>in Refmac<sup>542</sup>, or <sup>‡</sup>in Molprobrity<sup>44</sup>, respectively.

488 **Table S3: Primers used in this study**

| Primer name           | Sequence                                                  |
|-----------------------|-----------------------------------------------------------|
| SERK3prom-attB4       | GGGGACAACCTTTGTATAGAAAAGTTGCTTGTTTTTTGGAAACAGAG           |
| SERK3prom-attB1R      | GGGGACTGCTTTTTTGTACAAACTTGCTTTATCCTCAAGAGATTA             |
| SERK3-attB1           | GGGGACAAGTTTGTACAAAAAAGCAGGCTTAACCATGGAACGAAGATTAATGATCCC |
| SERK3noSTOP-attB2     | GGGGACCACCTTTGTACAAGAAAGCTGGGTATCTTGGACCCGAGGGGTATT       |
| SDM-fwSERK3_F60A      | CATGGGCTCATGTTACTTGCAATAGCGACAATAGTGTACACG                |
| SDM-rvSERK3_F60A      | AGTAACATGAGCCCATGTACATGGAGTAACAAGAGTAGCATCCC              |
| SDM-fwSERK3_H61A      | CATGGTTTGTCTGTTACTTGCAATAGCGACAATAGTGTACACG               |
| SDM-rvSERK3_H61A      | AGTAACAGCAAACCATGTACATGGAGTAACAAGAGTAGCATCCC              |
| SDM-fwSERK3_H61A-F60A | CATGGGCTGCTGTTACTTGCAATAGCGACAATAGTGTACACG                |
| SDM-rvSERK3_H61A-F60A | AGTAACAGCAGCCCATGTACATGGAGTAACAAGAGTAGCATCCC              |
| SDM-fwSERK3_Y100A     | AGGGAGCTTGCTAGCAATAACATTACTGGGACAATCCCAG                  |
| SDM-rvSERK3_Y100A     | GCTAGCAAGCTCCCTGTCATTACCATCTTTAATATTAATTC                 |
| SDM-fwSERK3_Y100A-cds | GGAGCTTGCTAGCAATAACATTACTGGGACAATCCCAG                    |
| SDM-rvSERK3_Y100A-cds | GTATTGCTAGCAAGCTCCAAGTACTGCAAGTTTGAAGC                    |
| SDM-fwSERK3_Y124A     | GATCTTGCCCTGAACAATTTAAGCGGGCCTATTCCATCAAC                 |
| SDM-rvSERK3_Y124A     | GTTCAAGGCAAGATCCAAGCTCACCAATCCGTCAGATTTCC                 |
| SDM-fwSERK3_F144A     | CTCCGTGCCTTGTATGCACCATATCTACTCTCTTTAATAC                  |
| SDM-rvSERK3_F144A     | GCATACAAGGCACGGAGTTTCTTAAGTCGGCCGAGAGTTG                  |
| SDM-fwSERK3_F144A-cds | CTCCGTGCCTTGGCTCTTAATAACAATAGCTTATCTGGAG                  |
| SDM-rvSERK3_F144A-cds | GACGCAAGGCACGGAGTTTCTTAAGTCGGCCGAGAGTTG                   |
| SDM-fwSERK3_R146A     | GGTTAGGGCTCTTAATAACAATAGCTTATCTGGAGAAAT                   |
| SDM-rvSERK3_R146A     | TATTAAGAGCCCTAACCACCAATACAAAAAGAGAATGTC                   |
| SDM-fwSERK3_R146A-cds | GTTTCTTGGCTCTTAATAACAATAGCTTATCTGGAGAAAT                  |
| SDM-rvSERK3_R146A-cds | TATTAAGAGCCAAGAAACGGAGTTTCTTAAGTCGGCCG                    |
| SDM-fwBIR2co_W73A     | GTCCTGC GCG AACAACCAGGAAAACCGCGTCATC                      |
| SDM-rvBIR2co_W73A     | GTTGTT CGC GCAGGACACGCCACGAAGTTGCAGAG                     |
| SDM-fwBIR2co_R79A     | GAGAAT GCG GTTATCAATCTTGAGCTTCGTGATATG                    |
| SDM-rvBIR2co_R79A     | GATAAC CGC ATTCTCTGATTGTTCCAACAAGACAC                     |
| SDM-fwBIR2co_E84R     | CAATCTT CGG CTTCGTGATATGGGTTTATCTGGTAAA                   |
| SDM-rvBIR2co_E84R     | CACGAAG CCG AAGATTGATAACCCTATT CTC CTGATTG                |
| SDM-fwBIR2co_F152A    | GTGTAGC GCT GTGAATCTTTGGTTTTGTCTGATAAC                    |
| SDM-rvBIR2co_F152A    | ATTCAC CGA GCTACACTAGCTAAATCAGGAGGAATC                    |
| SDM-fwBIR2co_V157D    | TCTTTG GAT TTGTCTGATAACCGGCTTTCGGGTCAA                    |
| SDM-rvBIR2co_V157D    | CAGACAA ATC CAAAGAATTCACAAAGC TAC ACTTAGC                 |
| SDM-fwBIR2co_R176A    | TTAGGG GCG TTAGGGAGGTTCTCTGTTGCTAATAATG                   |
| SDM-rvBIR2co_R176A    | CCCTAA CGC CCCTAAAGCCGAGAATGAACCGGGATT                    |
| BIR2_1-222_Gfw        | ATTCATACCGTCCCACCATCGGGCGCGG ATGAAAGAGATCGGCTCAAAACC      |
| BIR2_1-222_Grv        | CAAGCACCTGGAAGTACAGGTT CTCGAG ACCACCACAACCTCGAAGATAA      |
| BIR3_1-213_Gfw        | ATTCATACCGTCCCACCATCGGGCGCGG ATGAAGAAGATCTTCATCAC         |
| BIR3_1-213_Grv        | CAAGCACCTGGAAGTACAGGTTCTCGAG CGCTCCACATCGCGATAAAGG        |
| SERK3_1-220_Gfw       | ATTCATACCGTCCCACCATCGGGCGCGG ATGGAACGAAGATTAATGATCC       |
| SERK3_1-220_Grv       | CAAGCACCTGGAAGTACAGGTTCTCGAG ACTCCCTGCAGGTGATGG           |

SDM, primer used for site directed mutagenesis; rv, revers; fw, forward; G, primer used for Gibson cloning

## 489 References

1. Clouse, S. D., Langford, M. & McMorris, T. C. A Brassinosteroid-Insensitive Mutant in *Arabidopsis thaliana* Exhibits Multiple Defects in Growth and Development. *Plant Physiol.* **111**, 671–678 (1996).
2. Li, J. & Chory, J. A putative leucine-rich repeat receptor kinase involved in brassinosteroid signal transduction. *Cell* **90**, 929–938 (1997).
3. Hothorn, M. *et al.* Structural basis of steroid hormone perception by the receptor kinase BRI1. *Nature* **474**, 467–471 (2011).
4. She, J. *et al.* Structural insight into brassinosteroid perception by BRI1. *Nature* **474**, 472–476 (2011).
5. Santiago, J., Henzler, C. & Hothorn, M. Molecular mechanism for plant steroid receptor activation by somatic embryogenesis co-receptor kinases. *Science* **341**, 889–892 (2013).
6. Sun, Y. *et al.* Structure reveals that BAK1 as a co-receptor recognizes the BRI1-bound brassinolide. *Cell Res.* **23**, 1326–1329 (2013).
7. Wang, X. *et al.* Sequential transphosphorylation of the BRI1/BAK1 receptor kinase complex impacts early events in brassinosteroid signaling. *Dev. Cell* **15**, 220–235 (2008).
8. Bojar, D. *et al.* Crystal structures of the phosphorylated BRI1 kinase domain and implications for brassinosteroid signal initiation. *Plant J.* **78**, 31–43 (2014).
9. Hohmann, U., Lau, K. & Hothorn, M. The Structural Basis of Ligand Perception and Signal Activation by Receptor Kinases. *Annu. Rev. Plant Biol.* **68**, 109–137 (2017).
10. Hohmann, U. *et al.* Mechanistic basis for the activation of plant membrane receptor kinases by SERK-family co-receptors. *Proc. Natl. Acad. Sci.* *under revision, manuscript file attached*, (2018).
11. Belkhadir, Y. *et al.* Brassinosteroids modulate the efficiency of plant immune responses to microbe-associated molecular patterns. *Proc. Natl. Acad. Sci. U. S. A.* **109**, 297–302 (2012).
12. Jaillais, Y., Belkhadir, Y., Balsemão-Pires, E., Dangl, J. L. & Chory, J. Extracellular leucine-rich repeats as a platform for receptor/coreceptor complex formation. *Proc. Natl. Acad. Sci. U. S. A.* **108**, 8503–8507 (2011).

13. Halliday, K., Devlin, P. F., Whitelam, G. C., Hanhart, C. & Koornneef, M. The ELONGATED gene of Arabidopsis acts independently of light and gibberellins in the control of elongation growth. *Plant J. Cell Mol. Biol.* **9**, 305–312 (1996).
14. Whippo, C. W. & Hangarter, R. P. A brassinosteroid-hypersensitive mutant of BAK1 indicates that a convergence of photomorphogenic and hormonal signaling modulates phototropism. *Plant Physiol.* **139**, 448–457 (2005).
15. McAndrew, R. *et al.* Structure of the OsSERK2 leucine-rich repeat extracellular domain. *Acta Crystallogr. D Biol. Crystallogr.* **70**, 3080–3086 (2014).
16. Friedrichsen, D. M., Joazeiro, C. A. P., Li, J., Hunter, T. & Chory, J. Brassinosteroid-Insensitive-1 Is a Ubiquitously Expressed Leucine-Rich Repeat Receptor Serine/Threonine Kinase. *Plant Physiol.* **123**, 1247–1256 (2000).
17. Imkampe, J. *et al.* The Arabidopsis Leucine-Rich Repeat Receptor Kinase BIR3 Negatively Regulates BAK1 Receptor Complex Formation and Stabilizes BAK1. *Plant Cell* **29**, 2285–2303 (2017).
18. Halter, T. *et al.* The Leucine-Rich Repeat Receptor Kinase BIR2 Is a Negative Regulator of BAK1 in Plant Immunity. *Curr. Biol.* **24**, 134–143 (2014).
19. Santiago, J. *et al.* Mechanistic insight into a peptide hormone signaling complex mediating floral organ abscission. *eLife* **5**, e15075 (2016).
20. Gao, M. *et al.* Regulation of cell death and innate immunity by two receptor-like kinases in Arabidopsis. *Cell Host Microbe* **6**, 34–44 (2009).
21. Liu, Y., Huang, X., Li, M., He, P. & Zhang, Y. Loss-of-function of Arabidopsis receptor-like kinase BIR1 activates cell death and defense responses mediated by BAK1 and SOBIR1. *New Phytol.* **212**, 637–645 (2016).
22. Ma, C. *et al.* Structural basis for BIR1-mediated negative regulation of plant immunity. *Cell Res.* **27**, 1521–1524 (2017).
23. Blaum, B. S. *et al.* Structure of the pseudokinase domain of BIR2, a regulator of BAK1-mediated immune signaling in Arabidopsis. *J. Struct. Biol.* **186**, 112–121 (2014).
24. He, Z. *et al.* Perception of brassinosteroids by the extracellular domain of the receptor kinase BRI1. *Science* **288**, 2360–2363 (2000).

25. Wang, Z., Meng, P., Zhang, X., Ren, D. & Yang, S. BON1 interacts with the protein kinases BIR1 and BAK1 in modulation of temperature-dependent plant growth and cell death in *Arabidopsis*. *Plant J. Cell Mol. Biol.* **67**, 1081–1093 (2011).
26. Li, Y., Gou, M., Sun, Q. & Hua, J. Requirement of calcium binding, myristoylation, and protein-protein interaction for the Copine BON1 function in *Arabidopsis*. *J. Biol. Chem.* **285**, 29884–29891 (2010).
27. Bücherl, C. A. *et al.* Plant immune and growth receptors share common signalling components but localise to distinct plasma membrane nanodomains. *eLife* **6**, (2017).
28. Clough, S. J. & Bent, A. F. Floral dip: a simplified method for *Agrobacterium*-mediated transformation of *Arabidopsis thaliana*. *Plant J.* **16**, 735–743 (1998).
29. Schindelin, J. *et al.* Fiji: an open-source platform for biological-image analysis. *Nat. Methods* **9**, 676–682 (2012).
30. Kitcher, A. & Hothorn, L. A. Testing for qualitative interaction using ratios of treatment differences. *Stat. Med.* **33**, 1477–1489 (2014).
31. Hothorn, T., Bretz, F. & Westfall, P. Simultaneous inference in general parametric models. *Biom. J.* **50**, 346–363 (2008).
32. R Core Team. *R: A language and environment for statistical computing*. R Foundation for Statistical Computing, Vienna, Austria. 2013. (ISBN 3-900051-07-0, 2014).
33. Nuzzo, R. Scientific method: statistical errors. *Nature* **506**, 150–152 (2014).
34. Hashimoto, Y., Zhang, S. & Blissard, G. W. Ao38, a new cell line from eggs of the black witch moth, *Ascalapha odorata* (Lepidoptera: Noctuidae), is permissive for AcMNPV infection and produces high levels of recombinant proteins. *BMC Biotechnol.* **10**, 50 (2010).
35. Kozma, P., Hamori, A., Cottier, K., Kurunczi, S. & Horvath, R. Grating coupled interferometry for optical sensing. *Appl. Phys. B* **97**, 5–8 (2009).
36. Kabsch, W. Automatic processing of rotation diffraction data from crystals of initially unknown symmetry and cell constants. *J. Appl. Crystallogr.* **26**, 795–800 (1993).
37. Sheldrick, G. M. A short history of SHELX. *Acta Crystallogr. A* **64**, 112–122 (2008).
38. Adams, P. D. *et al.* PHENIX: a comprehensive Python-based system for macromolecular structure solution. *Acta Crystallogr. D Biol. Crystallogr.* **66**, 213–221 (2010).

39. Bricogne, G., Vonrhein, C., Flensburg, C., Schiltz, M. & Paciorek, W. Generation, representation and flow of phase information in structure determination: recent developments in and around SHARP 2.0. *Acta Crystallogr. D Biol. Crystallogr.* **59**, 2023–2030 (2003).
40. Terwilliger, T. C. SOLVE and RESOLVE: automated structure solution and density modification. *Methods Enzymol.* **374**, 22–37 (2003).
41. Emsley, P. & Cowtan, K. Coot: model-building tools for molecular graphics. *Acta Crystallogr. D Biol. Crystallogr.* **60**, 2126–2132 (2004).
42. Murshudov, G. N., Vagin, A. A. & Dodson, E. J. Refinement of macromolecular structures by the maximum-likelihood method. *Acta Crystallogr. D Biol. Crystallogr.* **53**, 240–255 (1997).
43. McCoy, A. J. *et al.* Phaser crystallographic software. *J. Appl. Crystallogr.* **40**, 658–674 (2007).
44. Davis, I. W. *et al.* MolProbity: all-atom contacts and structure validation for proteins and nucleic acids. *Nucleic Acids Res.* **35**, W375–383 (2007).
45. Pettersen, E. F. *et al.* UCSF Chimera--a visualization system for exploratory research and analysis. *J. Comput. Chem.* **25**, 1605–1612 (2004).
46. Kabsch, W. & Sander, C. Dictionary of protein secondary structure: pattern recognition of hydrogen-bonded and geometrical features. *Biopolymers* **22**, 2577–2637 (1983).
47. Krissinel, E. & Henrick, K. Inference of macromolecular assemblies from crystalline state. *J. Mol. Biol.* **372**, 774–797 (2007).

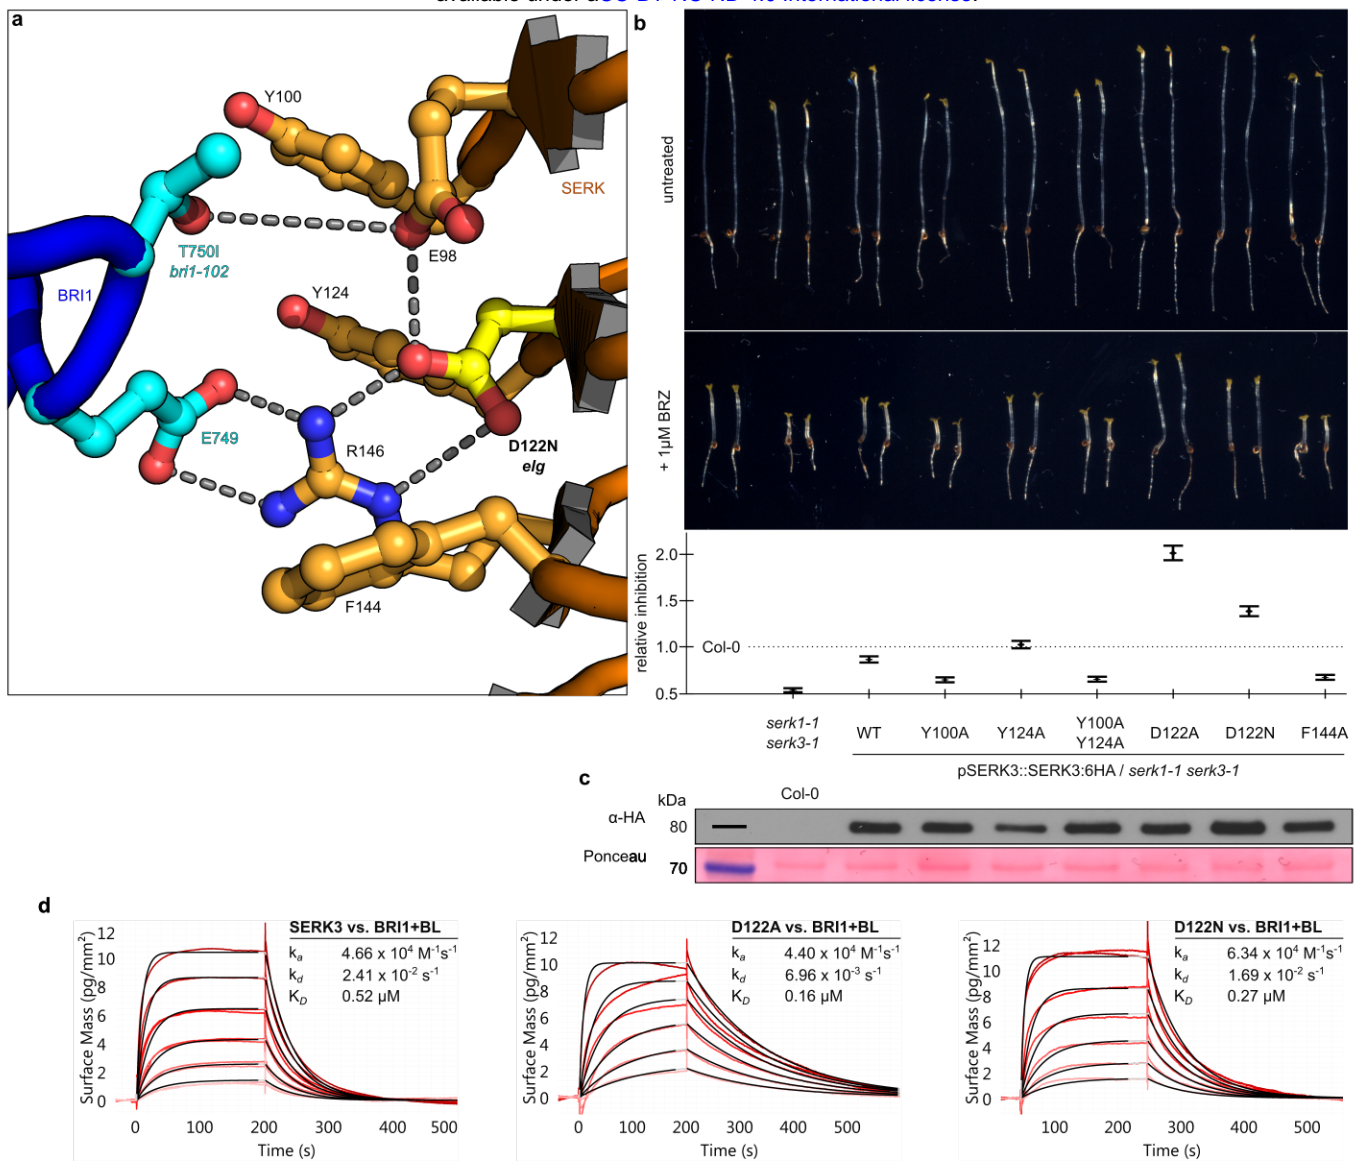

**Fig. 1: SERK3 *elg* is a gain of function allele *in vivo* but not *in vitro*.**

**a**, Ribbon diagram of the *elg*-containing complex interface, as seen in the BRI1 – BL – SERK1 structure (PDB-ID 4LSX<sup>5</sup>). BRI1 and SERK are depicted in blue and orange, respectively, selected residues are shown in ball-and-stick representation with the *elg* residue Asp122 highlighted in yellow. Polar interactions are shown as dotted lines. SERK residue numbering is according to the SERK3 sequence throughout.

**b**, Hypocotyl growth assay of dark grown seedlings in the pre- and absence of the BR biosynthesis inhibitor brassinazole (BRZ). The BRZ hypersensitivity seen in the *serk1-1 serk3-1* mutant is complemented by the expression of SERK3<sup>WT</sup> (Col-0 is the untransformed wild-type). Shown alongside is the quantification of the data with relative inhibition plotted together with lower and upper confidence intervals (N=5, n=50).

**c**, Western blot using an HA antibody against SERK3:HA from plant material shown in (a). A Ponceau loading control is shown alongside.

**d**, Binding kinetics for SERK3, SERK3<sup>D122A</sup> and SERK3<sup>D122N</sup> (*elg*) vs. BRI1 in the presence of BL obtained from grating-coupled interferometry (GCI) experiments. Sensograms with recorded data are shown in red with the respective fits in black, and include table summaries of the corresponding association rate constant ( $k_a$ ), dissociation rate constant ( $k_d$ ) and dissociation constant  $K_D$ .

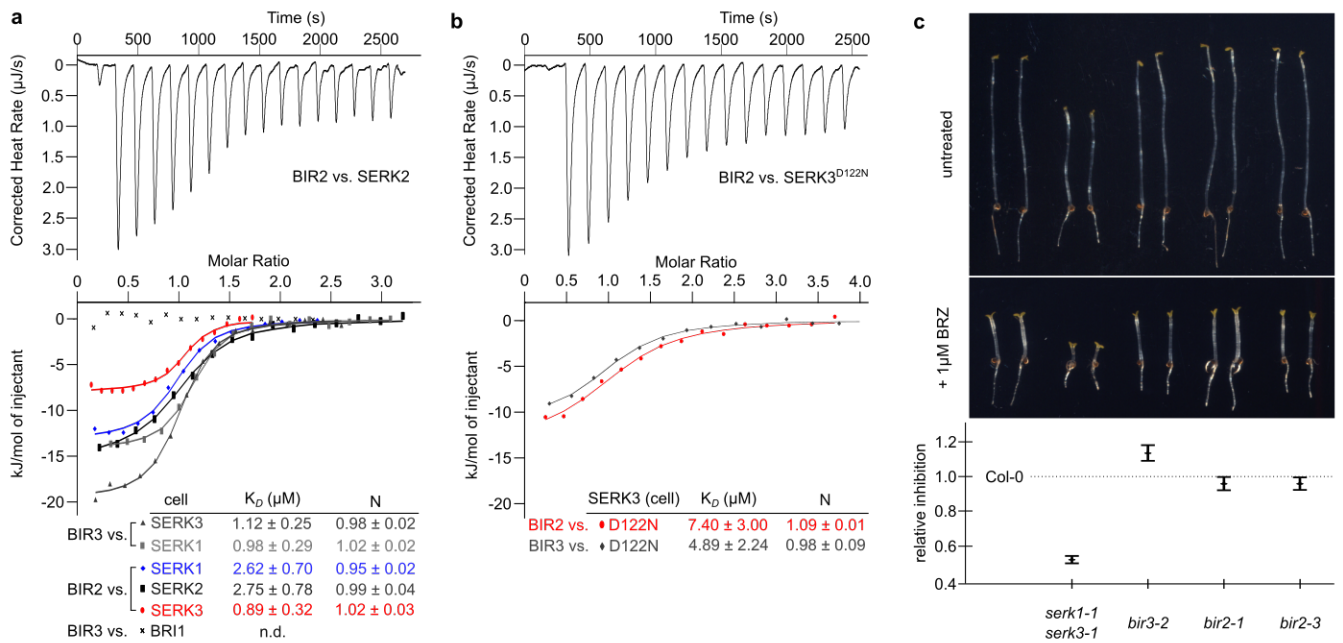

**Fig. 2: BIR ectodomains interact with different SERK co-receptors *in vitro*.**

**a,b,** Isothermal titration calorimetry (ITC) experiments of BIR2 and BIR3 LRR domains vs. (a) wild-type SERK ectodomains and (b) vs. the SERK3<sup>D122N</sup> mutant ectodomain and including table summaries for dissociation constants ( $K_D$ ) and binding stoichiometries (N) ( $\pm$  fitting error; n.d.: no detectable binding).

**c,** Hypocotyl growth assay in the pre- and absence of BRZ (compare Fig. 1b). Relative inhibition together with upper and lower confidence intervals are shown alongside; Col-0 and *serk1-1 serk3-1* are the same as shown in Fig. 1b (N=5, n=50).



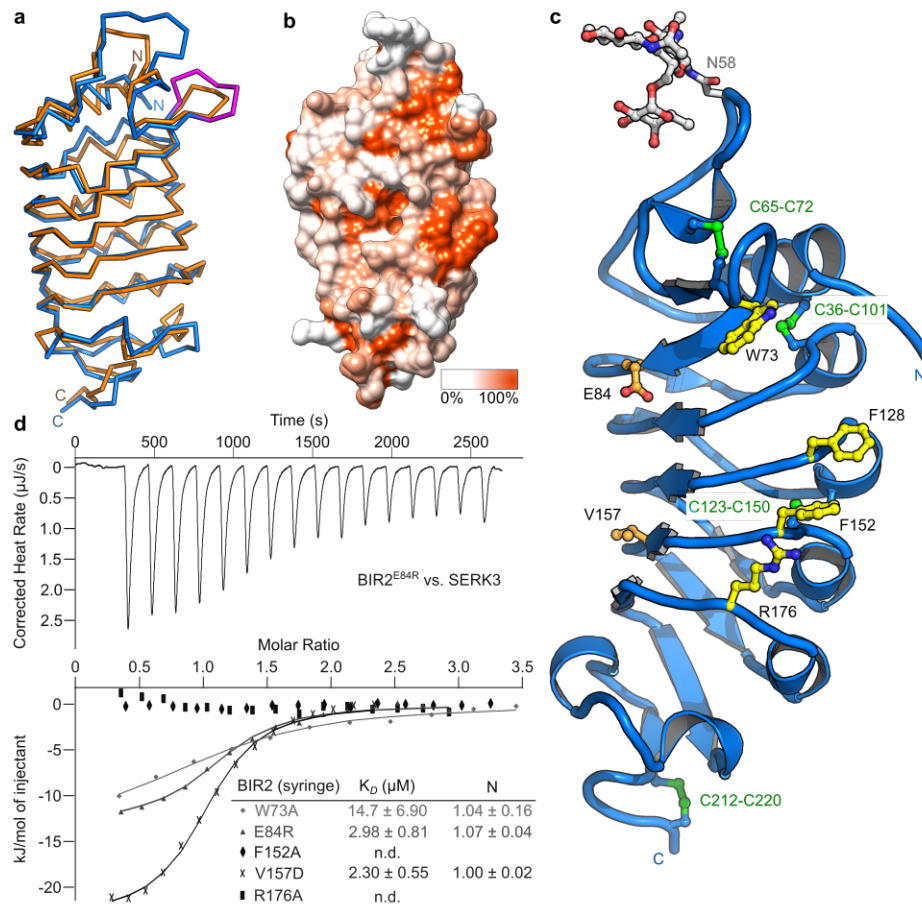

**Fig. 3: The BIR2 ectodomain adopts a SERK-like fold with an additional lateral protein interaction interface.**

**a**, Structural superposition of the isolated BIR2 and SERK1 (PDB-ID 4LSC<sup>5</sup>) ectodomains (r.m.s.d. is  $\sim 1.5$  Å comparing 175 corresponding C $\alpha$  atoms). C $\alpha$  traces of SERK1 (orange) and BIR2 (blue) are shown; the unique, protruding BIR2 N-terminal cap loop region is highlighted in magenta.

**b**, Surface representation of the BIR2 ectodomain, gradient colored according to the amino-acid sequence conservation of BIR proteins from different species (compare Fig. S4).

**c**, The extracellular BIR2 domain consists of five LRRs with N- and C-terminal capping domains and a lateral protein interaction interface. Shown is a ribbon diagram of the BIR2 LRR domain (in blue), the four disulfide bonds are highlighted in green, selected residues in the lateral interface are in yellow, residues in the LRR central groove in orange, and the N-glycan moiety in gray (all in ball-and-sticks representation).

**d**, ITC experiments of BIR2 ectodomain mutants vs. the extracellular domain of SERK3 with table summaries alongside.

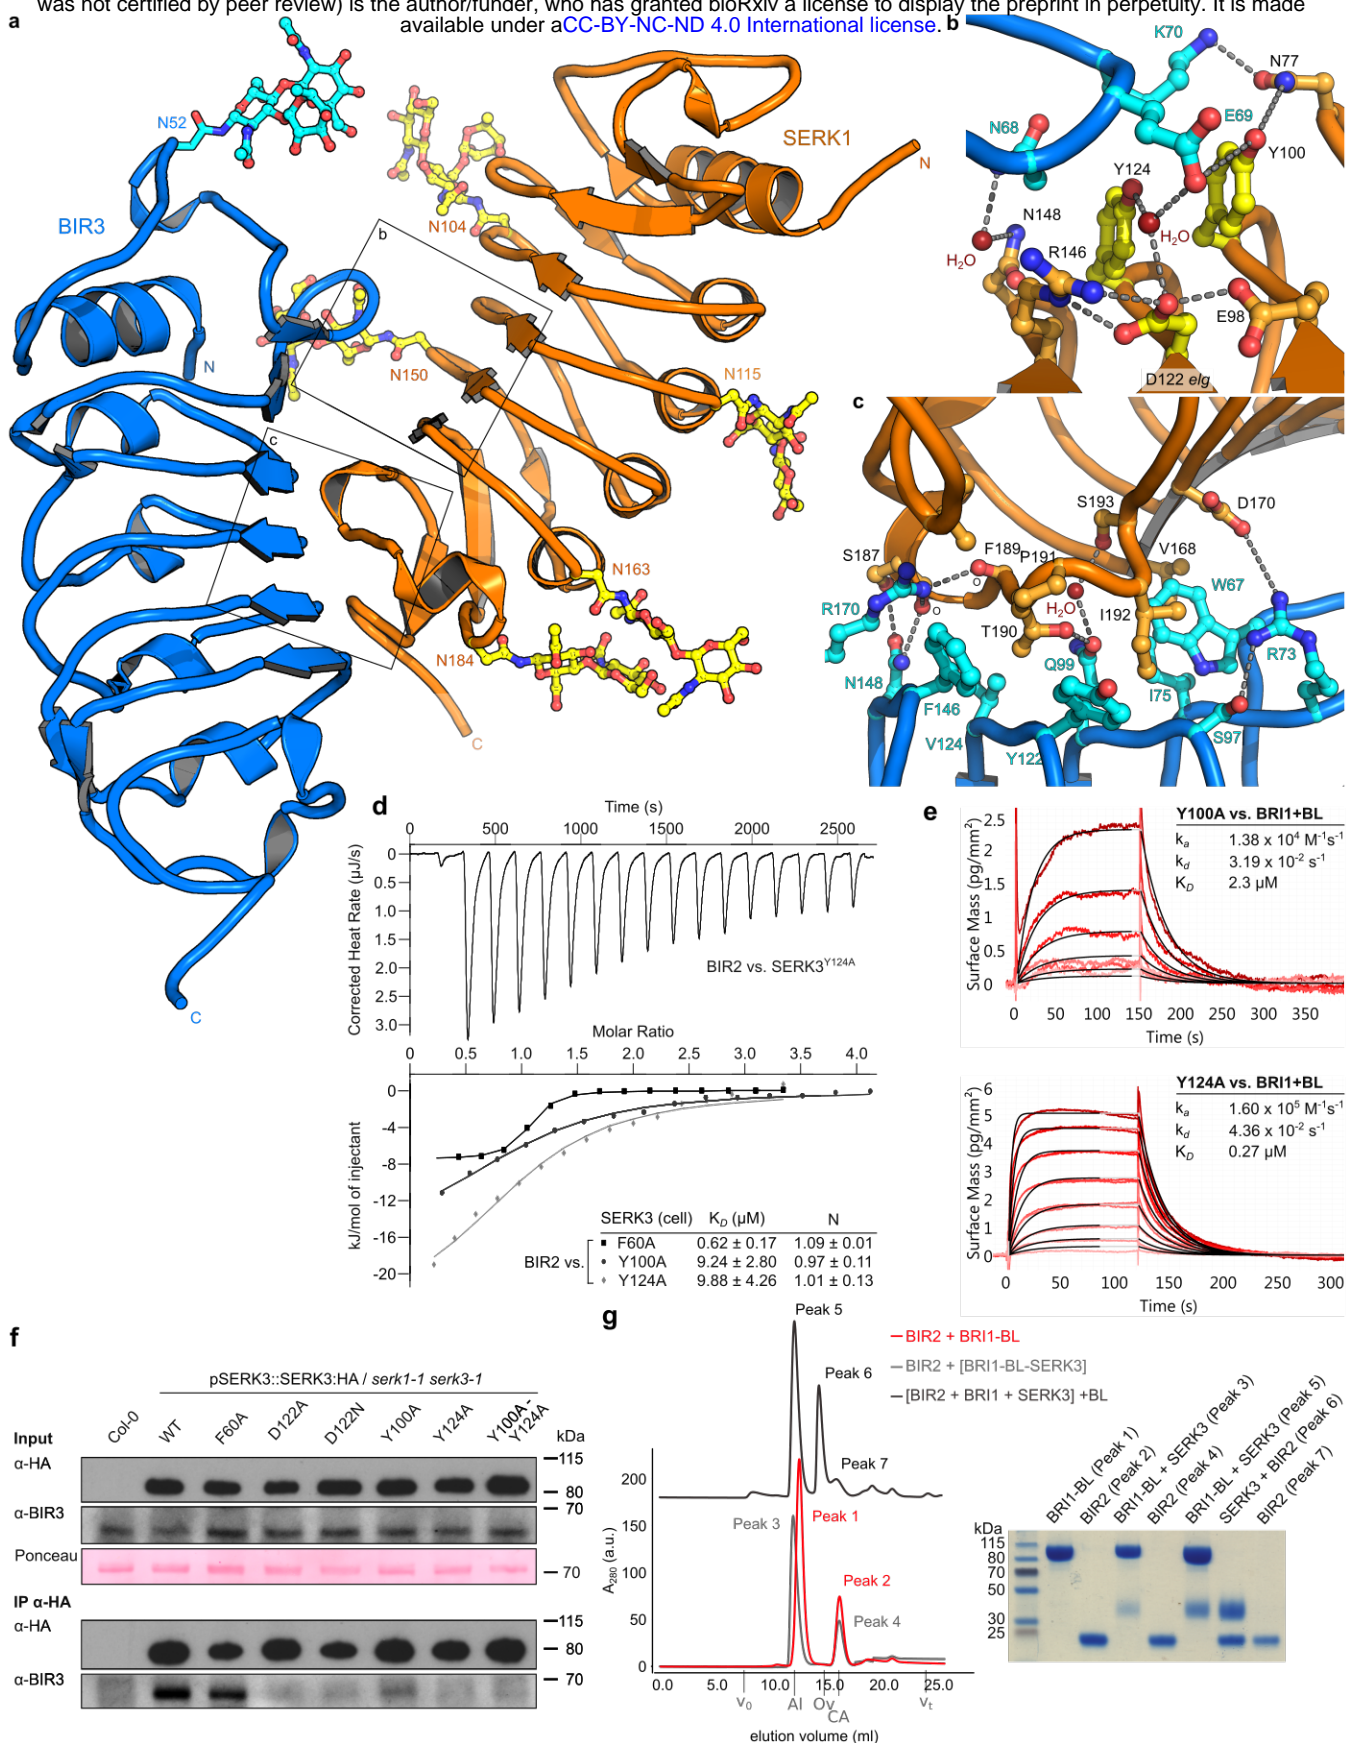

**Fig. 4: A BIR3-SERK1 complex structure provides a mechanism for SERK gain-of-function mutations.**

**a**, Structure of the BIR3 – SERK1 ectodomain complex, with BIR3 shown in blue and SERK1 in orange and with N-glycans highlighted in ball-and-sticks representation.

**b,c**, Detailed views of the BIR3 – SERK1 complex interface. Selected interface residues are shown in ball-and-sticks representation with the mutationally analyzed Tyr100, Asp122 and Y214 highlighted in yellow. Water molecules are depicted as red spheres, polar interactions are shown as dotted lines.

**d**, ITC binding experiments of BIR2 vs. different SERK3 mutants.

**e**, Binding kinetics of SERK3<sup>Y100A</sup> and SERK3<sup>Y124A</sup> to BL-associated BRI1 derived from GCI experiments. Fitted kinetic parameters are shown alongside.

**f**, Co-immunoprecipitation (Co-IP) experiment using different SERK3 lines vs. BIR3. Input western-blots and a Ponceau stained membrane are shown alongside.

**g**, Size-exclusion chromatography experiments using the BIR2, SERK3, BRI1 ectodomains. BIR2 forms no complex with BRI1 (red line), and is not able to dissociate a preformed BRI1 – BL – SERK3 complex (gray line). However, incubation of a preformed BIR2 – SERK3 complex with BRI1 – BL reveals formation of BRI1 – BL – SERK3 complexes (black line), suggesting that BRI1 – BL can compete with BIR2 for SERK3 binding. Void ( $v_0$ ) and total volume ( $v_t$ ) are shown, together with elution volumes for molecular mass standards (Al, Aldolase, 158,000 Da; Ov, Ovalbumin, 44,000 Da; CA, Carbonic anhydrase, 29,000 Da). Peak fractions were analyzed by SDS-PAGE.

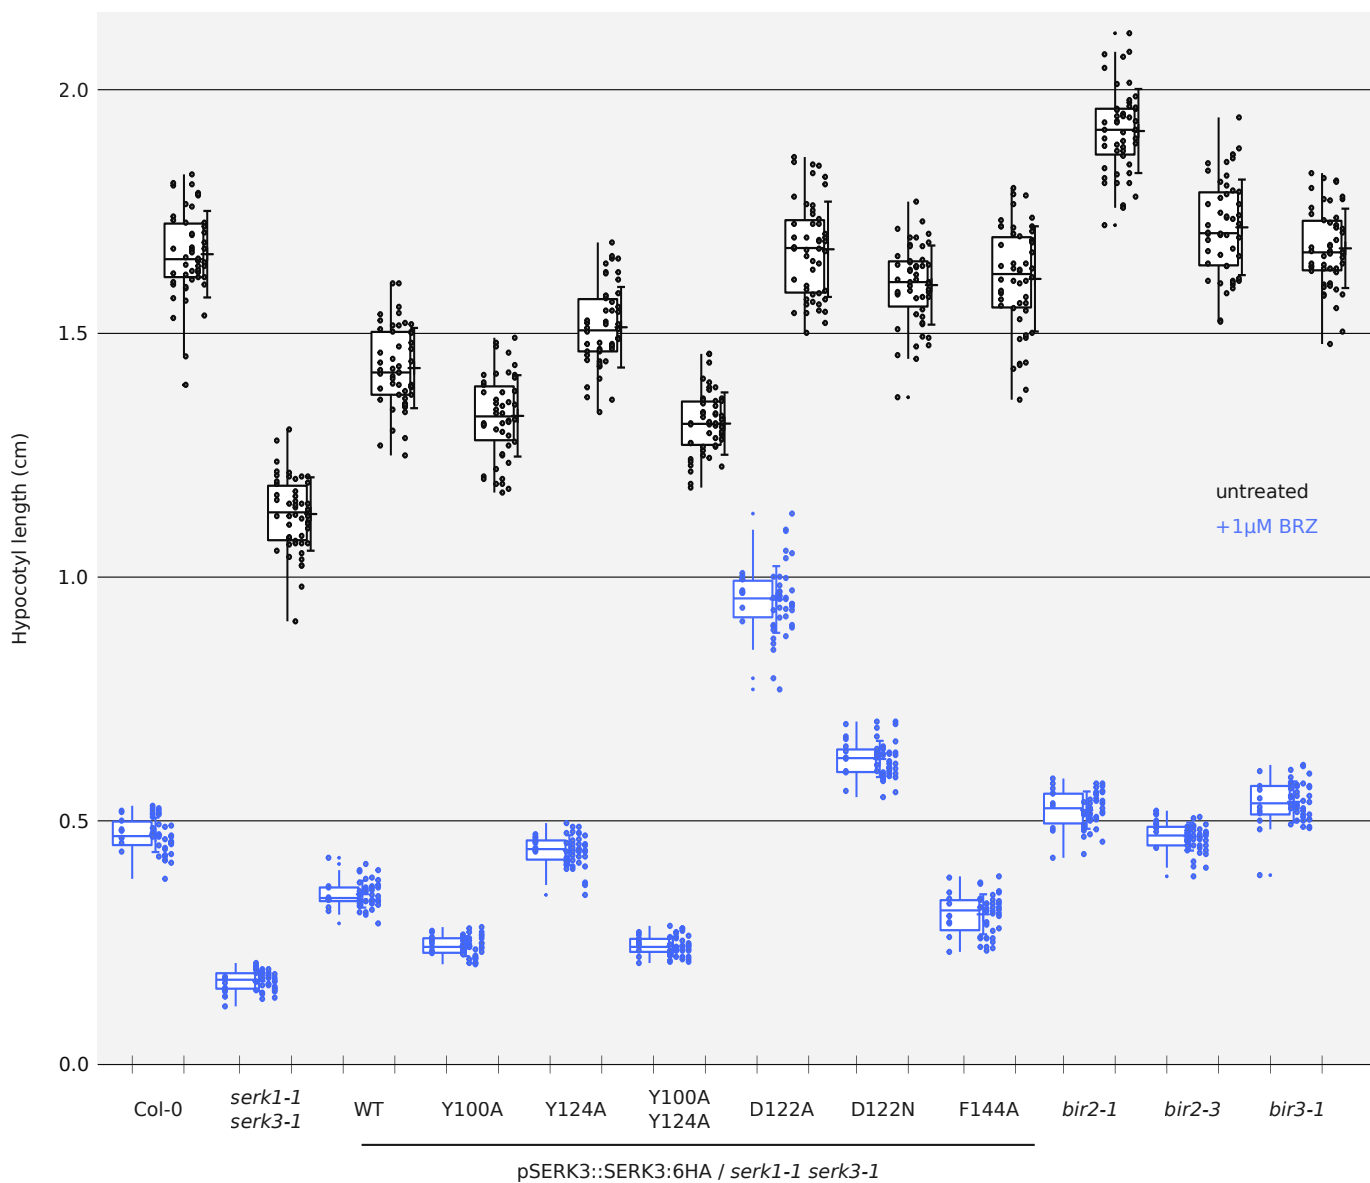

**Fig. S1: Hypocotyl growth assay raw data.**

Shown are box plots with the raw data depicted as individual dots. Untreated: black, BRZ treated: blue, N=5, n=50.

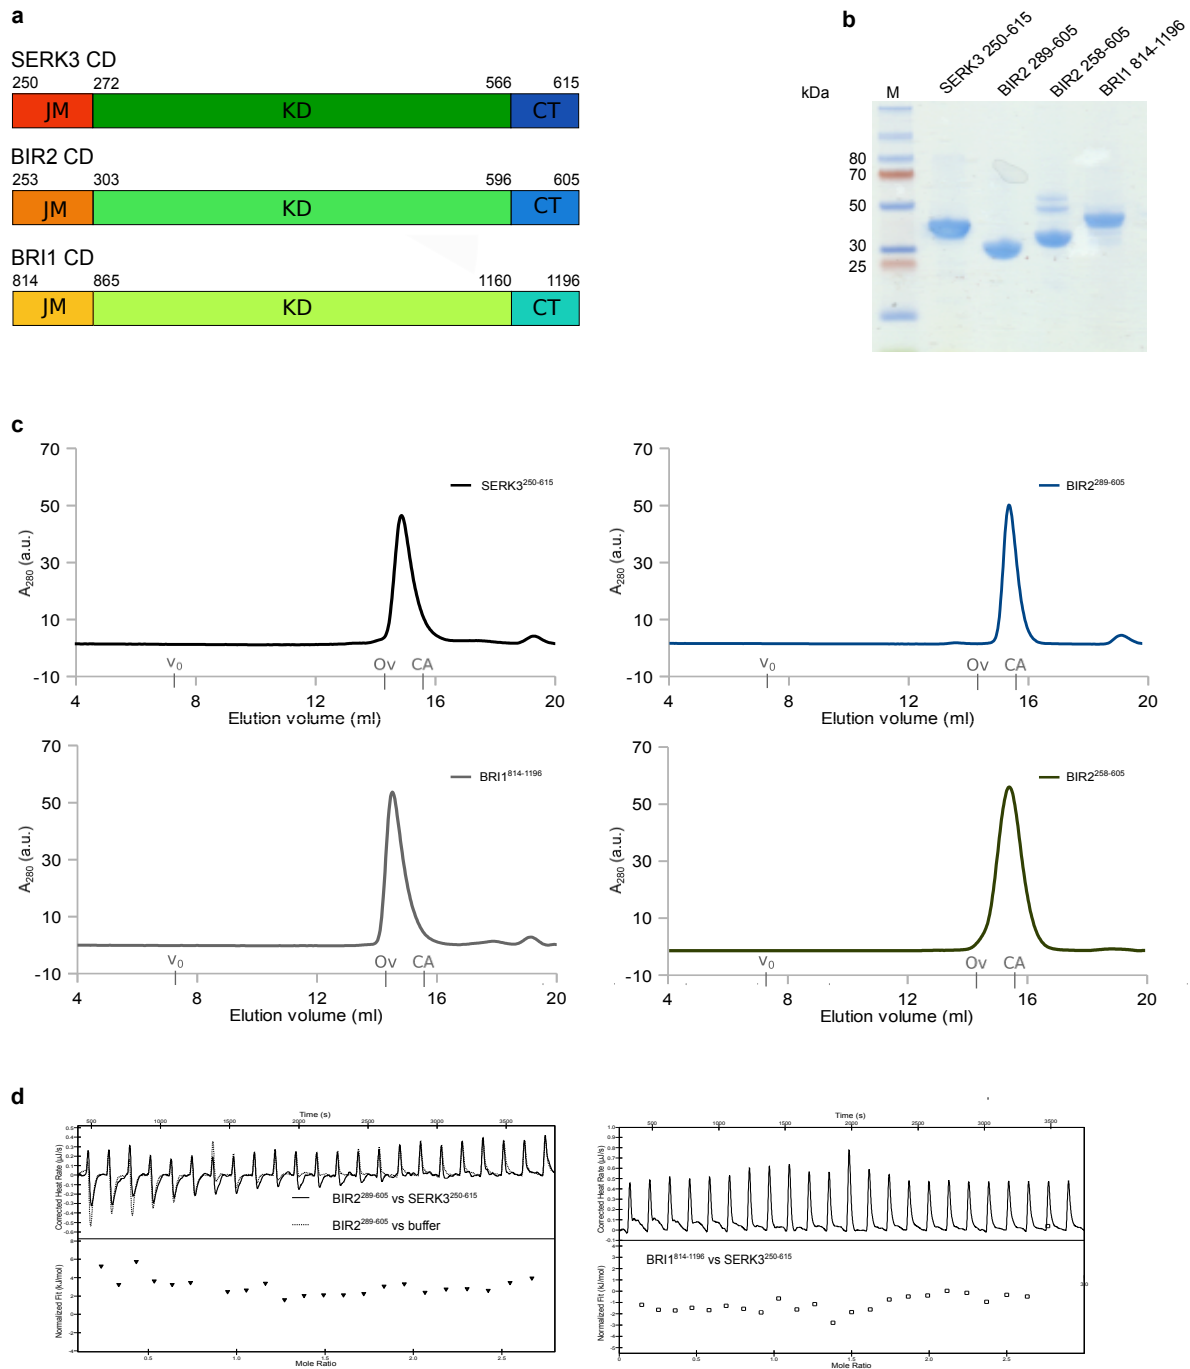

**Fig. S2: The recombinant BIR2 and SERK3 cytoplasmic domains do not interact *in vitro*.**

**a**, Structural organization of the SERK3, BIR2 and BRI1 cytoplasmic domains (CD) with domain borders included. JM, juxtamembrane domain; KD, kinase domain; CT, C-terminal domain.

**b,c**, Analysis of the purified cytoplasmic domains on **(b)** a Coomassie stained 10 % SDS-PAGE gel and **(c)** by size exclusion chromatography on a Superdex 200 increase 10/300 GL column (GE Healthcare) reveals that all isolated cytoplasmic domains behave as apparent monomers in solution. The void ( $v_0$ ) volume is shown, together with elution volumes for molecular mass standards (Ov, Ovalbumin, 44,000 Da; CA, Carbonic anhydrase, 29,000 Da).

**d**, Isothermal titration calorimetry (ITC) experiments with cytoplasmic domains of SERK3 vs. BIR2 (left) and BRI1 (right). No binding was detected, suggesting that the binding affinity between BIR2 and SERK3 or BRI1 and SERK3 is relatively low. Thus, BIR binding may be driven by their extracellular, rather than by their cytoplasmic domains.

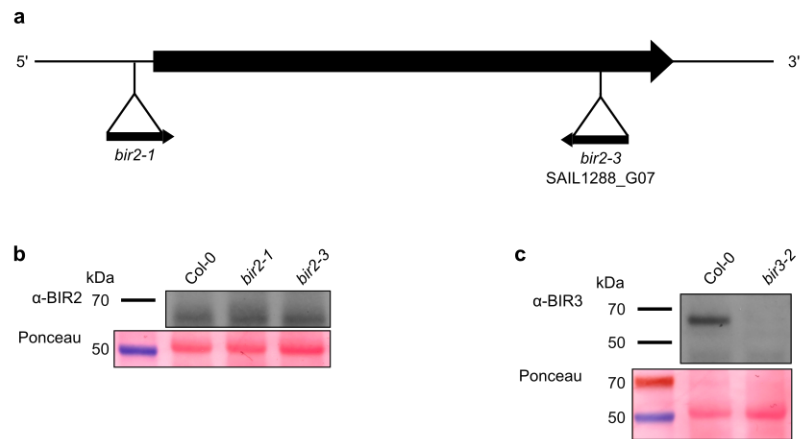

**Fig. S3: Expression levels of BIR2/3 in mutant lines.**

**a**, Schematic overview of the T-DNA insertion sites *bir2-1*<sup>18</sup> and *bir2-3* (SAIL1288\_G07, this study) shown as black triangles in the *BIR2* locus (bold black arrow).

**b**, Analysis of BIR2 protein levels in wild-type Col-0, *bir2-1* and *bir2-3* mutant plants.

**c**, BIR3 protein levels in Col-0 and *bir3-2*<sup>17</sup> mutant lines. Ponceau stained membranes are shown alongside as loading controls.

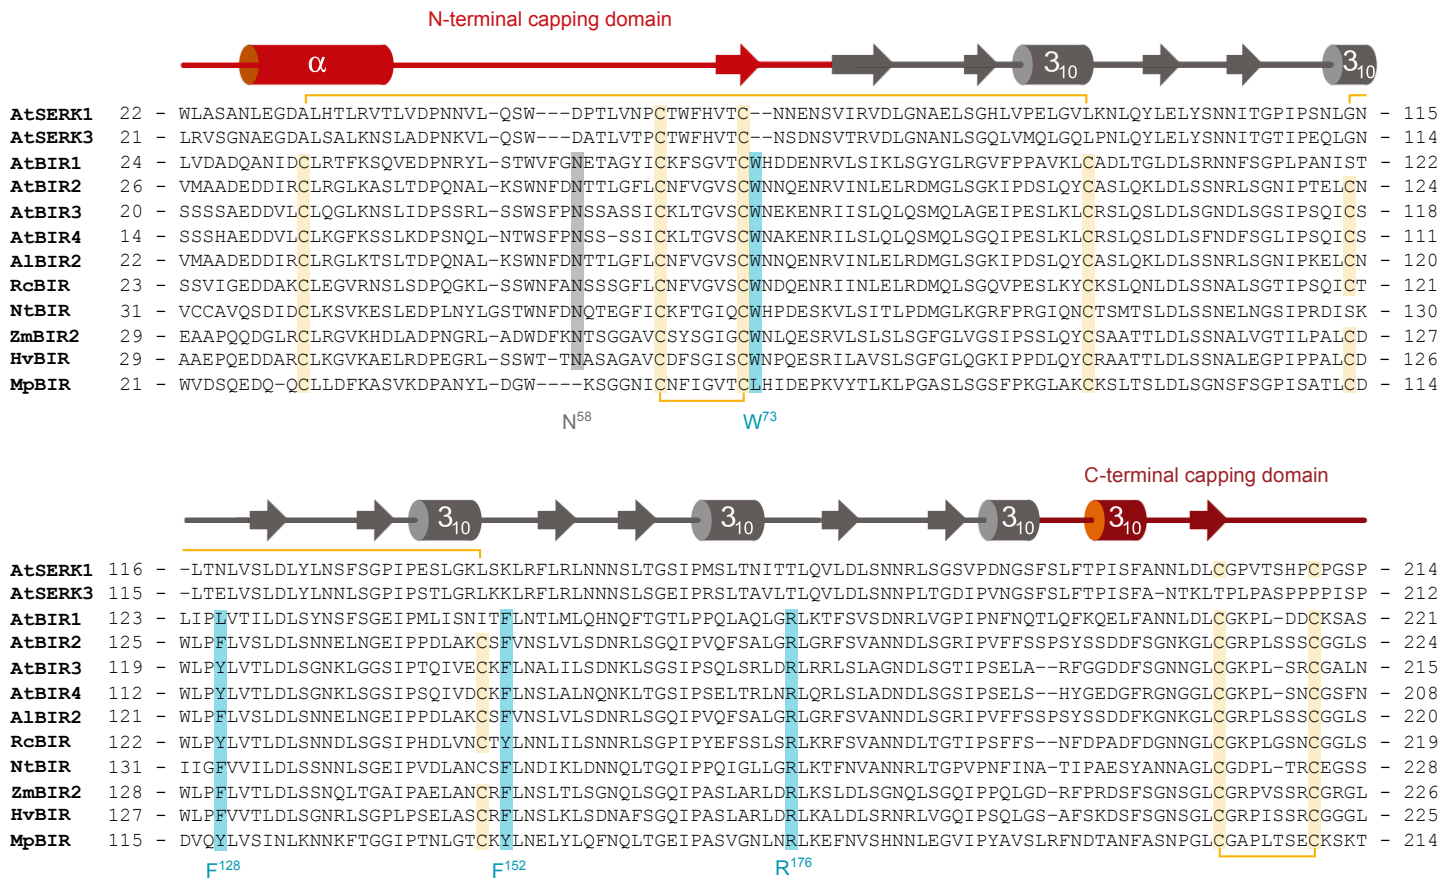

**Fig. S4: BIR – SERK complex interface residues are conserved among BIR family members from different species.**

**a**, Structure based sequence alignment of the ectodomains of *Arabidopsis thaliana* SERK1 (Uniprot [<http://www.uniprot.org>] identifier: Q94AG2), SERK3 (Uniprot identifier: Q94F62), BIR1 (Uniprot identifier: Q9ASS4), BIR2 (Uniprot identifier: 1), BIR3 (Uniprot identifier: O04567), BIR4 (Uniprot identifier: COLG15), *Arabidopsis lyrata* BIR2 (Uniprot identifier: D7LPU1), *Ricinus communis* BIR (Uniprot identifier: B9RU15), *Nicotiana tabacum* BIR (Uniprot identifier: A0A1S4BB12), *Zea mays* BIR2 (Uniprot identifier: K7TUC5), *Hordeum vulgare* BIR (Uniprot identifier: F2E7N3) and *Marchantia polymorpha* BIR (Uniprot identifier: A7VM20). Shown alongside is a secondary structure assignment, with the N- and C-terminal capping domains highlighted in red, calculated using DSSP<sup>46</sup>. BIR residues of the lateral protein interaction interface are highlighted in blue, disulfide bridges in yellow and the conserved N-terminal glycosylation site in gray. All numbering refers to AtBIR2.

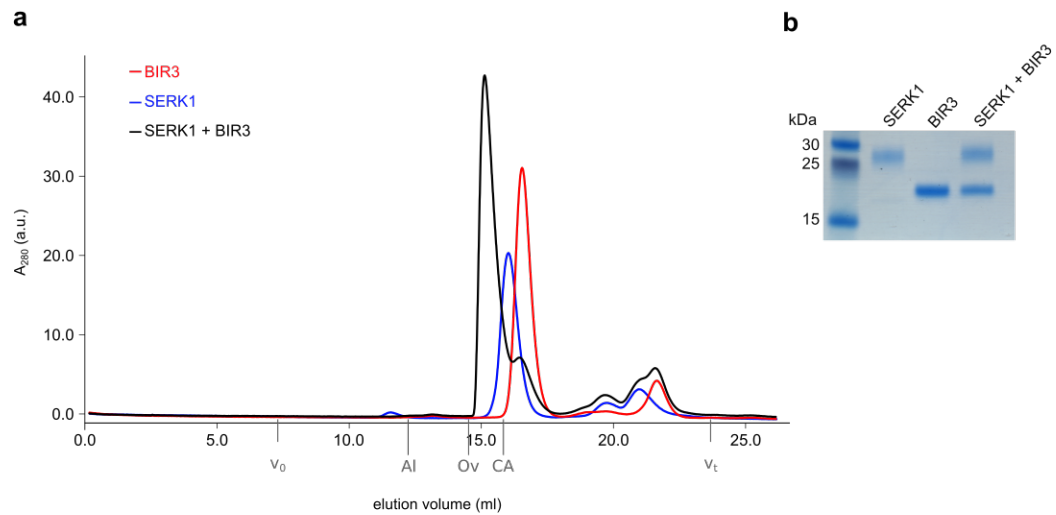

**Fig. S5: The BIR3 and SERK1 ectodomains form heterodimers in solution.**

**a,b**, Analytical size exclusion chromatography. The isolated BIR3 (red absorption trace) and SERK3 (blue) ectodomains elute as apparent monomers when run in isolation, and form a heterodimeric complex (black line). Void ( $v_0$ ) volume and total volume ( $v_t$ ) are shown, together with elution volumes for molecular mass standards (AI, Aldolase, 158,000 Da; Ov, Ovalbumin, 44,000 Da; CA, Carbonic anhydrase, 29,000 Da). A SDS PAGE analysis of the peak fractions is shown in (b).

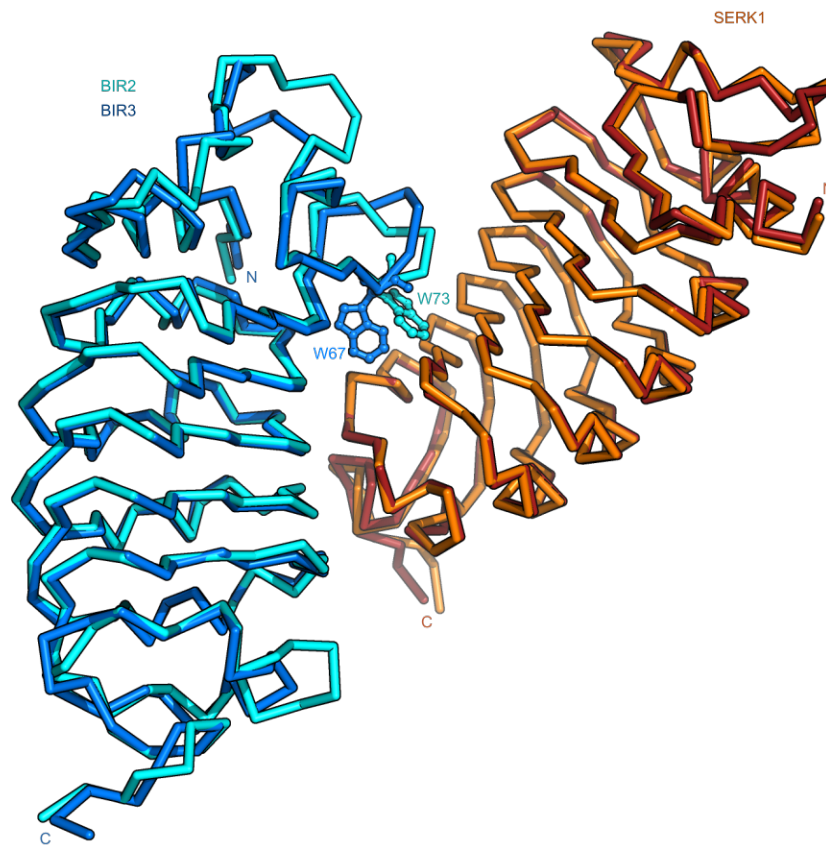

**Fig. S6: No major conformational changes occur upon BIR3 – SERK1 complex formation.**

Structural superposition of the BIR3 – SERK1 complex with the isolated BIR2 (r.m.s.d. is  $\sim 1.2$  Å comparing 160 corresponding  $C_{\alpha}$  atoms) and SERK1 (PDB-ID 4LSC<sup>5</sup>, r.m.s.d. is  $\sim 0.9$  Å comparing 186 corresponding  $C_{\alpha}$  atoms) ectodomains. Shown are  $C_{\alpha}$  traces of SERK1 (orange for the isolated ectodomain and red for SERK1 in complex with BIR3), BIR2 (in cyan) and BIR3 (in blue). BIR3<sup>W67</sup> and the corresponding BIR2<sup>W73</sup> are highlighted as ball-and-sticks.



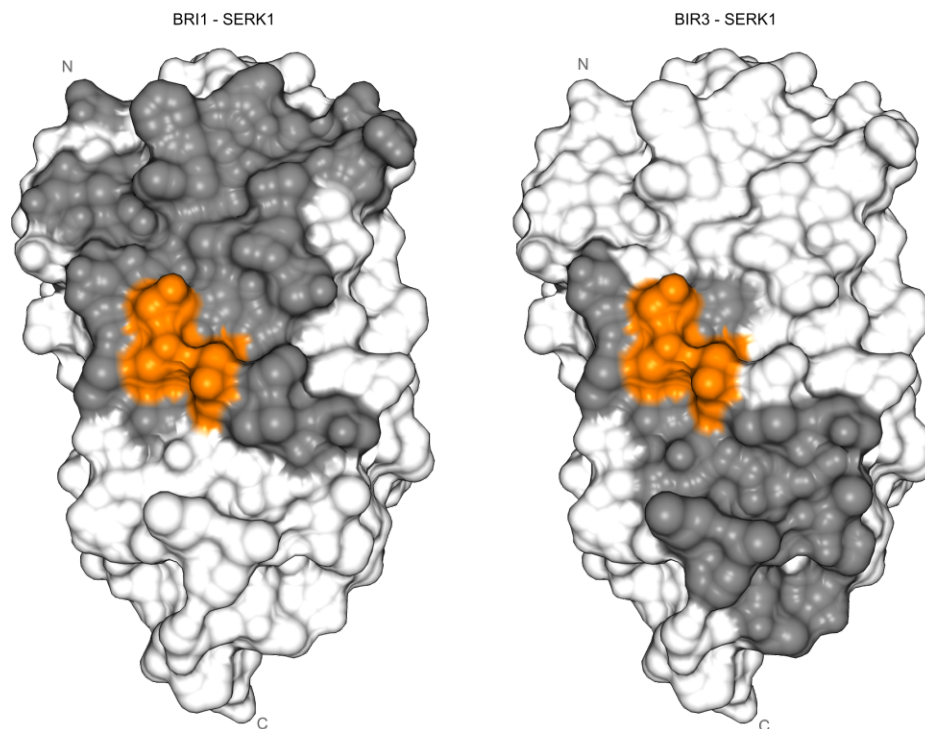

**Fig. S7: Partly overlapping surface areas in SERK1 are involved in BRI1 and BIR3 binding, respectively.**

Surface view of the SERK1 ectodomain with BRI1 (left) and BIR3 (right) interacting residues (defined using the program PISA<sup>47</sup>) shown in dark gray. Interaction with BRI1 involves mainly residues originating from the SERK1 N-terminal cap, while the interaction with BIR3 involves residues from the two C-terminal LRRs and from the C-terminal cap. Importantly, the *elg* mutation and the corresponding SERK3<sup>D122</sup> forms part of both complex interfaces (highlighted in orange).
